1 ***Circadian clock mechanism driving mammalian photoperiodism***

2

3 Wood S.H.<sup>1,2,8</sup>, Hindle, M.M.<sup>3,8</sup>, Mizoro, Y.<sup>1</sup>, Cheng, Y.<sup>4,5</sup>, Saer B.R.C.<sup>1</sup>,  
4 Miedzinska K.<sup>3</sup>, Christian H.C.<sup>6</sup>, Begley, N.<sup>1</sup>, McNeilly J.<sup>7</sup>, McNeilly A.S.<sup>7</sup>,  
5 Meddle, S.L.<sup>3</sup>, Burt, D.W.<sup>3,4</sup>, Loudon A.S.I.<sup>1\*</sup>

6

7 <sup>1</sup> Centre for Biological Timing, Faculty of Life Sciences, University of  
8 Manchester, Manchester M13 9PT, UK

9 <sup>2</sup> Arctic Chronobiology and Physiology research group, Department of Arctic  
10 and Marine Biology, UiT – The Arctic University of Norway, Tromsø NO-9037,  
11 Norway

12 <sup>3</sup> The Roslin Institute, and Royal (Dick) School of Veterinary Studies University  
13 of Edinburgh, Roslin, Midlothian EH25 9PRG, UK

14 <sup>4</sup> UQ Genomics Initiative, The University of Queensland, Brisbane, QLD 4072,  
15 Australia

16 <sup>5</sup> School of Life and Environmental Sciences, Faculty of Science, The University  
17 of Sydney, New South Wales, Australia

18 <sup>6</sup> University of Oxford, Department of Physiology, Anatomy and Genetics, Le  
19 Gros Clark Building, South Parks Road, Oxford, OX1 3QX, UK

20 <sup>7</sup> MRC Centre for Reproductive Health, Queen's Medical Research Institute,  
21 Edinburgh EH16 4TJ, UK

22 <sup>8</sup> These authors contributed equally

23 \*Corresponding author

## 24 **Abstract**

25 The annual photoperiod cycle provides the critical environmental cue  
26 synchronizing rhythms of life in seasonal habitats. In 1936, Bünning proposed  
27 a circadian-basis for photoperiodic synchronization. Here, light-dark cycles  
28 entrain a circadian rhythm of photosensitivity, and the expression of summer or  
29 winter biology depends on whether light coincides with the phase of high  
30 photosensitivity. Formal studies support the universality of this so-called  
31 coincidence timer, but we lack understanding of the mechanisms involved. Here  
32 we show in mammals that coincidence timing takes place in the *pars tuberalis*  
33 of the pituitary, through a melatonin-dependent flip-flop switch between  
34 circadian transcriptional activation and repression. Long photoperiods produce  
35 short night-time melatonin signals, leading to induction of the circadian  
36 transcription factor *BMAL2*, in turn triggering summer biology through the eyes  
37 absent / thyrotrophin (EYA3 / TSH) pathway. Conversely, short photoperiods  
38 produce long melatonin signals, inducing circadian repressors including *DEC1*,  
39 in turn suppressing *BMAL2* and the EYA3/TSH pathway, triggering winter  
40 biology. These actions are associated with progressive genome-wide changes  
41 in chromatin state, elaborating the effect of the circadian coincidence timer.  
42 Hence, circadian clock interactions with pituitary epigenetic pathways form the  
43 basis of the mammalian coincidence timer mechanism. Our results constitute a  
44 blueprint for circadian-based seasonal timekeeping in vertebrates.

## 45 INTRODUCTION

46 The annual photoperiod cycle provides a critical predictive environmental cue  
47 driving annual cycles of fertility, physiology and behaviour in most animal  
48 species. In 1936, Erwin Bünning proposed the “external coincidence”  
49 hypothesis for a circadian-based timing mechanism driving photoperiodic  
50 responses in plants<sup>1</sup>. The proposition was that photoperiod entrains a circadian  
51 rhythm of photosensitivity, and the expression of summer or winter biology  
52 depends on whether or not light coincides with the phase of high  
53 photosensitivity. An “internal coincidence” model has also been proposed  
54 where the role of light is to entrain two circadian oscillators and the phase  
55 relationship between the two oscillators determines the response to  
56 photoperiod<sup>2,3</sup>. In either case the role of the circadian clock is central and formal  
57 studies support the universality of a “coincidence timer” in animals<sup>2-7</sup>, but we  
58 lack understanding of the mechanisms involved.

59 In mammals, the duration of the night-time pineal melatonin signal is sculpted  
60 by the photoperiod and is a critical regulator of annual cycles of reproduction,  
61 growth and metabolism<sup>8-14</sup>. The melatonin signal is decoded within the *pars*  
62 *tuberalis* (PT) of the pituitary gland<sup>9,13,15-18</sup>. Day-length dependent changes in  
63 hypothalamic thyroid hormone (TH) metabolism control the seasonal changes  
64 in physiology and are regulated via the PT, through altered secretion of  
65 thyrotrophin (TSH)<sup>19-21</sup>. This TSH circuit is specific to the PT, and distinct from  
66 that in the anterior pituitary, which controls normal thyroid gland function. LP-  
67 activation of PT-TSH depends on regulation of TSH $\beta$  subunit expression by the  
68 transcriptional co-activator, EYA3, which operates as a TSH on-switch. EYA3  
69 co-activates the PAR bZIP Transcription Factor TEF (thyrotroph embryonic  
70 factor) via a D-box element on the *TSH $\beta$*  promoter<sup>22-24</sup> (Fig. 1a). This prior work  
71 places EYA3 at the centre of photoperiodic time measurement within the  
72 melatonin target tissue, but does not explain how expression is regulated by  
73 the seasonal clockwork.

74 In addition to acute circadian-based mechanisms an epigenetic basis to longer-  
75 term seasonal control in flowering in plants is well established. Specifically, the  
76 duration of cold temperatures during the winter season alters chromatin

77 accessibility at key genes, and is a requirement for full photoperiod induced  
78 flowering (vernalisation) <sup>25-27</sup>. In animals, no evidence for dynamic genome-  
79 wide seasonal epigenetic regulation of transcription has been described.

80 Here, we show that coincidence timing depends on a flip-flop switch between  
81 the expression of the circadian genes *BMAL2*, (a paralogue of the circadian  
82 regulator *BMAL1*) and *DEC1*, and their respective activating or suppressive  
83 effects on *EYA3* in the PT. The duration of the melatonin signal is key in  
84 sculpting these molecular components. Additionally, the effect of the  
85 coincidence timer is elaborated by progressive genome-wide changes in  
86 epigenetic status at key seasonal gene promoters. Therefore, circadian clock  
87 interactions with pituitary epigenetic pathways form the basis of the mammalian  
88 coincidence timer mechanism.

## 89 RESULTS

### 90 ***Epigenetic regulation of the seasonal transcriptome within the Pars*** 91 ***tuberalis***

92 Seasonally breeding sheep are a well-established photoperiodic model for the  
93 study of neuroendocrine mechanisms underpinning seasonal physiology <sup>14,28,29</sup>.  
94 Using a study design that compared the effects of transfer from long  
95 photoperiod (LP) to short photoperiod (SP) with transfer from SP to LP (Fig. 1b),  
96 we collected pars tuberalis (PT) tissue at 1,7 and 28 days after transfer, with  
97 collections timed for 4-h after lights on (ZT4), when *EYA3* expression peaks  
98 under LP <sup>22,24,29</sup>. Changes in prolactin concentrations <sup>29–31</sup> confirmed  
99 photoperiodic hormone responses, as well as LP activation of *EYA3*, and  
100 inverse expression patterns of *TSH $\beta$*  (LP marker) and *CHGA* (SP marker) (Fig.  
101 1b, Supplementary Fig. 1a-d, n=4), validating this paradigm.

102 Comparing LP day 28 to SP day 28 by electron microscopy we found an  
103 increased nuclear diameter, equating to an approximate doubling in volume of  
104 PT thyrotrophs, and a marked reduction in chromatin density on LP (Fig. 1c,  
105 Supplementary Fig. 1e & f). These morphological changes were not seen in  
106 *Pars distalis* (PD) somatotrophs (Fig. 1c, Supplementary Fig. 1e & f ). We  
107 hypothesized that increased chromatin accessibility may account for the  
108 photoinductive effects of LP and therefore changes in the seasonal  
109 transcriptome.

110 Comparing all seasonal time-points (Fig. 1b) we performed ChIP-seq (histone  
111 marker H3K4me3, Supplementary Table 1 & 2, n=2) and RNA-seq  
112 (Supplementary Table 3, n=3) to screen for seasonal transcriptional activation.  
113 To determine if epigenetic changes in H3K4me3 marks were associated with  
114 transcriptional activation we first improved the sheep genome annotation of  
115 transcripts and transcription start sites (TSS) with PT RNA and a combination  
116 of “Cap Analysis of Gene Expression” (CAGE-seq, Supplementary Table 4) <sup>32</sup>  
117 and ISOSEQ long-read RNA-seq (SRA: PRJNA391103, see methods for  
118 details). Using this improved annotation we identified H3K4me3 peak  
119 distribution on genomic features to be similar to previous studies <sup>33–35</sup>, validating  
120 the approach (see methods section).

121 Next we identified seasonally expressed genes, as defined by RNA-seq  
122 analysis of differentially regulated genes (DEGs) in the SP to LP and LP to SP  
123 transfers (Supplementary Table 3), and observed a strong correlation between  
124 seasonal gene expression and H3K4me3 peaks around the transcription start  
125 sites (TSS's)(Fig. 1d). Importantly, this correlation was absent in non-  
126 seasonally regulated genes (Fig. 1d). Histone modifications are precisely  
127 balanced by methyltransferases ("writers"), demethylases ("erasers") and  
128 effector proteins ("readers"), therefore we checked the RNA expression of  
129 H3K4me3 readers, writers and erasers but found no seasonal changes  
130 (Supplementary Table 5). This suggests that changes in protein activity of  
131 H3K4me3 modulators may be key in the observed seasonal alterations in  
132 H3K4me3 marks.).

133 We noted that approximately 70% of seasonally DEGs (Supplementary Table  
134 3) had more than one TSS compared to only ~20% of the PT genomic  
135 background (Supplementary Fig. 1g, Supplementary Table 4). Next we took  
136 genes that were up-regulated in either SP or LP and plotted the proportion of  
137 genes with multiple TSS's, and repeated this for H3K4me3 marked TSS's, this  
138 revealed that H3K4me3 marks are more likely to occur on genes with multiple  
139 TSS's (Supplementary Fig. 1h) and highly expressed seasonal DEGs have a  
140 greater prevalence of multiple TSSs than non-seasonal genes expressed at the  
141 same level. Furthermore, this phenomenon was more pronounced in LP than  
142 SP. This indicates an enrichment of multiple TSS's in LP up-regulated genes  
143 which is associated with the H3K4me3 mark.

144 To investigate which promoter motifs may be actively transcribed we searched  
145 for enriched transcription factor binding site motifs in the TSS's marked with  
146 H3K4me3 in the LP day 28 vs SP day 28 comparison (Fig. 1e, Supplementary  
147 Fig. 2a & b). This showed enrichment of D-box binding motifs, Basic Leucine  
148 Zipper ATF-Like transcription related factors and POU domains for in both the  
149 up and down-regulated genes (Fig. 1e).

150 *TSH $\beta$* , an exemplar seasonal D-box regulated gene<sup>22,23</sup>, revealed progressive  
151 activation by LP, correlated with expression, and with no detectable H3K4me3  
152 mark at either SP day 28 or 84 (R=0.961, p-value=0.002, Fig. 1f, g &

153 Supplementary Fig. 1b). In contrast, CHGA revealed an inverse seasonal  
154 pattern ( $R=0.843$ ,  $p\text{-value}=0.009$ , Supplementary Fig. 2c, d, Supplementary Fig.  
155 1b & c). Global enrichment of D-box sites on LP-activated genes indicates a  
156 potentially extensive role for TEF, SIX1 and EYA3 co-activation in seasonal  
157 regulation of physiology, and strongly focuses attention on the regulation of  
158 EYA3.

159 In line with our global analysis showing the presence of multiple TSSs in  
160 seasonally expressed genes we identified two transcription start sites in *EYA3*,  
161 an up-stream TSS with non-canonical E-boxes and a downstream TSS  
162 containing two paired canonical E-Boxes (Fig. 1h). CAGE analysis revealed  
163 that only the down-stream TSS was actively transcribed on LP (Fig. 1h,  
164 Supplementary Table 4). We correlated RNA expression with H3K4me3 marks  
165 for both TSS's, which confirmed seasonal regulation specific to the down-  
166 stream TSS (*EYA3* downstream TSS:  $R=0.778$ ,  $P=0.02$ , Fig. 1h & i, *EYA3*  
167 upstream TSS:  $R=0.308$ ,  $P=0.46$ , Supplementary Fig. 2e & f). Next, we cloned  
168 each *EYA3* TSS into luciferase reporters, and using COS7 cells transfected the  
169 reporters along with known E-box regulators<sup>22,23</sup> (see methods for details). This  
170 revealed significant activation specific to the downstream (seasonal) TSS  
171 (Supplementary Fig. 2g), likely due to the presence of multiple canonical e-box  
172 pairs.

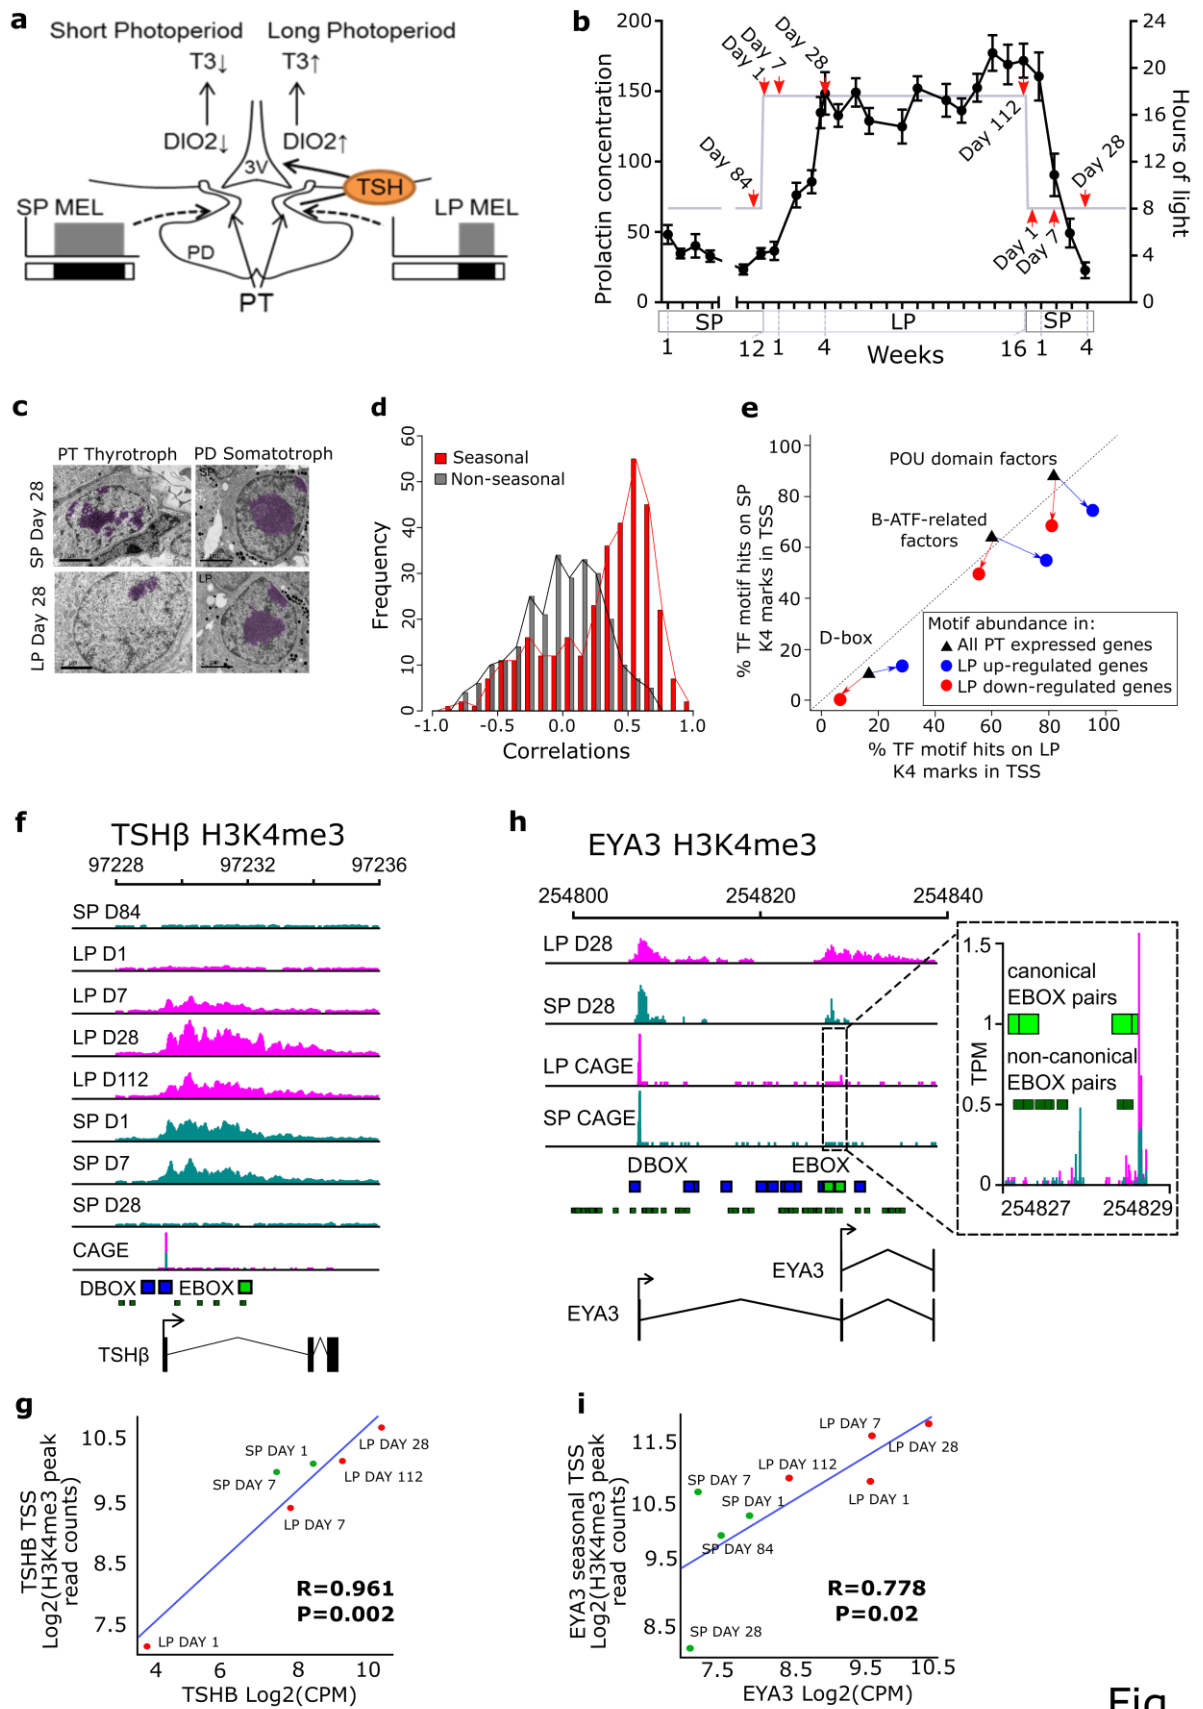

173

Fig. 1



Figure 1: Photoperiod dependent epigenetic regulation of transcription in the *Pars tuberalis*

a. Current model for the mammalian photoperiodic circuitry. Rhythmic melatonin production from the pineal gland represent short (winter) photoperiods are represented by increased duration of melatonin and long (summer) photoperiods by short duration melatonin. The prime site of melatonin action is the pituitary pars tuberalis driving changes in thyroid hormone availability via day length dependent changes in TSH production. *EYA3* is an LP expressed gene that is a strong coactivator of *TSH $\beta$*  expression in the pars tuberalis in synergy with TEF, *SIX1* and DBP though D-box binding.

b. Study sampling points indicated by red arrows. Grey line represents number of hours of light the animals received in 24 hour modulo, all animals were sampled at ZT4 except at day 28 where animals in both LP and SP were collected across the day at 4 hour intervals (see data in Figure 3). The black line with error bars corresponds to the prolactin concentrations in plasma for 30 animals. The first double line gap in the graph indicates the gap in weeks between sampling during SPs. Error bars represent the SEM.

c. EM images of PT thyrotrophs and PD somatotrophs at LP day 28 and SP day 28. Dense chromatin in the nucleus is false coloured in purple. Black scale bars = 2 $\mu$ m.

d. Histogram revealing frequency distributions of Pearson correlation coefficients between RNA expression ( $\log_2$  CPM) and H3K4me3 peak read counts  $\pm 200$  bp from TSSs ( $\log_2$  read counts). Red bars are seasonally expressed genes ( $\log_2$  fold change  $\geq 1$  or  $\leq -1$  and adjusted p value  $< 0.05$  of SPday84 vs LPday1, 7, 28 and LPday112 vs SPday1, 7, 28 shown in Fig. 2a, differentially expressed genes (DEGs)=480, duplicates were removed) and black bars are non-seasonally expressed genes ( $\log_2$  fold change  $\leq 0.1$  and  $\geq -0.1$  from the same pairwise above, number of genes=218, duplicates were removed).

e. Plot of the over-represented motifs in the active promoters of both LP day 84 up and down-regulated genes, as compared to SP day 84. The axis plot the percentage of inferred active promoters, containing one or more observed motifs, for a given cohort of genes. Active promoters are defined as contiguous H3K4me3 marked regions within 100bp of a TSS. The black triangles represents the motif abundance on active promoters in all the genes expressed ( $>0$  CPM) in the pars tuberalis (PT) and the percentage of their active promoters containing a binding motif for LP (x-axis) and SP (y-axis) H3K4me3 environments. The blue and red circles are the motif coverage of activate promoters in up-regulated and down-regulated LP genes respectively. See supplementary figure G and H for all motifs that are significantly enriched (FDR  $< 0.05$ ; fishers two-way exact test) in the active promoters of either up OR down-regulated genes.

f. ChIP-seq tracks for *TSH $\beta$*  gene H3K4me3 peaks across all experimental time-points. Chromosome 1 region is shown. CAGE-seq track identifying active TSS's in LP day 28 vs SP day 28. Pink represents samples in long photoperiod and marine green represents short photoperiod. Solid green boxes are canonical E-box motifs. Blue boxes are D-box motifs.

g. Correlation plot for *TSH $\beta$*   $\log_2$  H3k4me3 peaks from ChIP-seq versus *TSH $\beta$*   $\log_2$  counts per million (CPM) from RNA-seq. Red symbols are LP sampling points, green are SP sampling points. Correlation coefficient R is shown. R=0.961, p-value=0.002. Note: SP day 28 and 84 are not included because the H3k4me3 peaks are very low.

h. ChIP-seq tracks for *EYA3* gene H3K4me3 peaks. Chromosome 2 region is shown. CAGE-seq track identifying active TSS's in LP day 28 vs SP day 28. Zoom in box provided to identify the downstream promoter.

i. Correlation plot for *EYA3* downstream TSS  $\log_2$  H3K4me3 peaks from ChIP-seq versus *EYA3*  $\log_2$  counts per million (CPM) from RNA-seq. Red symbols are LP sampling points, green are SP sampling points. Correlation coefficient R is shown. R=0.778, p-value=0.02.

## 175 ***BMAL2 – the missing circadian component in the photoperiodic response***

176 The E-box regulators *CLOCK* and *BMAL1* do not show significant changes in  
177 amplitude in the PT under different photoperiods <sup>22,36</sup>, therefore we aimed to  
178 identify a candidate circadian E-box regulator of the *EYA3* downstream TSS.  
179 The prediction is that a circadian E-box regulator, would peak in expression  
180 only when light falls on the photosensitive phase, as in the early light phase of  
181 LP (approx. ZT4), and would be absent on SP where the photosensitive phase  
182 is masked by darkness. The RNA-seq dataset revealed progressive up-  
183 regulation by LP of multiple transcripts, and a slower inverse pattern on SP (Fig.  
184 2a, Supplementary Table 3).

185

186 Importantly these data identified *BMAL2*, an E-box regulator and paralogue of  
187 *BMAL1*, as progressively up-regulated on LP (Fig. 2a & b), closely matching  
188 the expression profile for *EYA3* (Fig. 2b). We tested whether *BMAL2* was  
189 capable of activating the downstream *EYA3* TSS (Supplementary Fig. 2h). In  
190 the presence of *CLOCK*, or alone, *BMAL2* had a weak non-significant effect,  
191 but in the presence of *BMAL1* and *CLOCK*, we observed significant 4 to 5-fold  
192 activation (Supplementary Fig. 2h, Fig. 2c). We then tested whether this  
193 depended on direct E-box binding by *BMAL2*, by mutating the *BMAL2* DNA-  
194 binding domain (arginine of basic helix-loop-helix domain to alanine R88A <sup>37</sup>),  
195 and observed near-identical augmentation of *EYA3* expression (Fig. 2d). The  
196 observation that transcription factors can act as co-activators <sup>38</sup> and that bHLH  
197 circadian transcription factors require internal PAS domains for functional  
198 protein-protein interactions <sup>39</sup>, with PAS-B an essential domain for *BMAL1*  
199 protein-protein interactions <sup>40</sup> led us to mutate the PAS-B domain on ovine  
200 *BMAL2* (F427R\_V439R) <sup>40</sup>. This significantly impaired *EYA3* activation,  
201 blocking the co-activation effect with *BMAL1* and *CLOCK* (Fig. 2e). This  
202 suggests that *BMAL2* operates as a co-activator of *EYA3*, in a *CLOCK/BMAL1*-  
203 dependent manner, requiring PAS-B dependent protein-protein interactions for  
204 the mechanism of action.

205 We assessed the daily profile of *BMAL2* by in-situ hybridization, using archived  
206 material <sup>24</sup>. This revealed strong LP-dependent induction of *BMAL2* in the early  
207 light phase (ZT3, Fig. 2f), and flat low 24h expression on SP. Collectively this

208 reveals that BMAL2 operates as a co-activator driving photoperiodic responses,  
 209 and fulfils the criteria as a candidate activating arm of the circadian-based  
 210 coincidence timer.

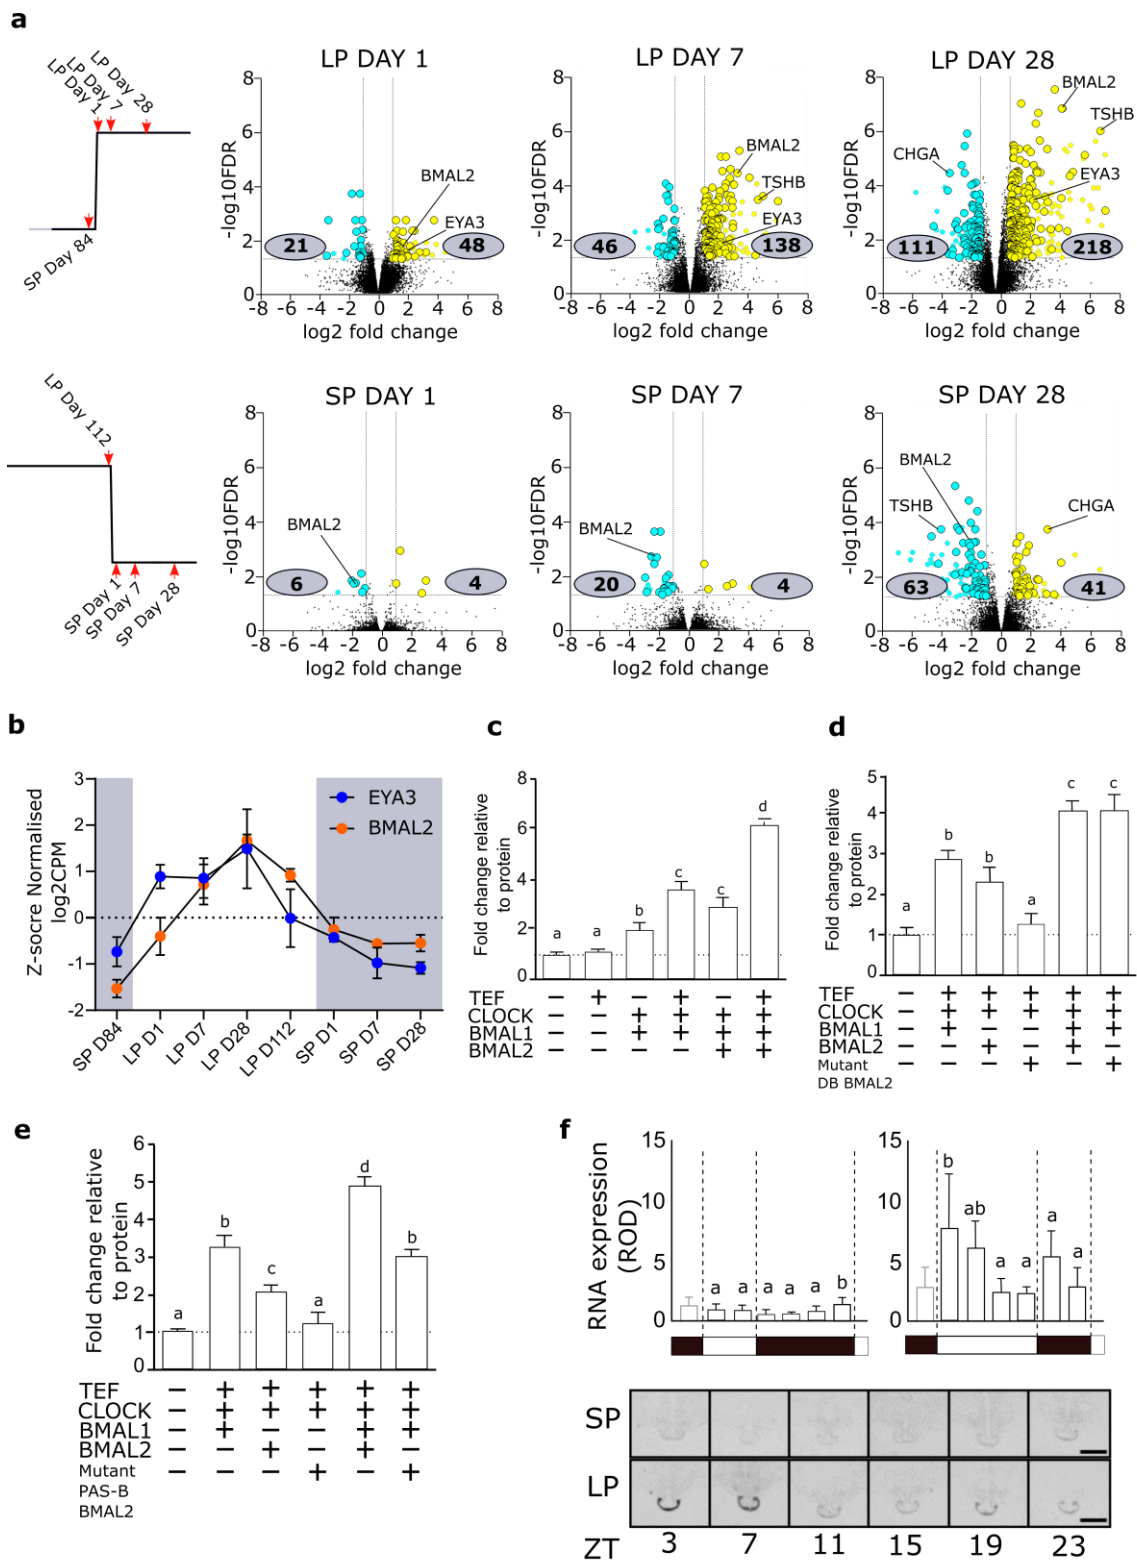

211

Fig. 2

Figure 2: Identification of BMAL2

a. Volcano plots showing the number of genes up (yellow) and downregulated (blue) in pairwise comparisons. The design for the comparisons is shown on the left. These plots demonstrate the consistency of the BMAL2 seasonal signal. Numbers in grey boxes are the differentially expressed genes in the pairwise comparisons (Supplementary Table 3).

b. Z-score normalized log<sub>2</sub>CPM RNA-seq plots for EYA3 (blue) and BMAL2 (orange) across the whole experiment. Statistical significances are found in Supplementary Table 3.

c. Transactivation of the EYA3-downstream-TSS-luc reporter by TEF, CLOCK, BMAL1 and BMAL2. The experiment was repeated 4 times (n=4 per experiment), plot displayed is a representative result. A one-way ANOVA was performed on each individual experiment using Tukey's multiple comparisons test. Different letters indicate significant differences between groups (P < 0.01). Error bars SEM.

d. Transactivation of the EYA3-downstream-TSS-luc reporter by TEF, CLOCK, BMAL1 and BMAL2. The lack of effect of mutating the DNA binding domain of BMAL2 is shown. The experiment was repeated 4 times (n=4 per experiment), plot displayed is a representative result. A one-way ANOVA was performed on each individual experiment using Tukey's multiple comparisons test. Different letters indicate significant differences between groups (P < 0.01). Error bars SEM.

e. Transactivation of the EYA3-downstream-TSS-luc reporter by TEF, CLOCK, BMAL1 and BMAL2. The effect of mutating the PAS-B domain of BMAL2 is shown. The experiment was repeated 4 times (n=4 per experiment), plot displayed is a representative result. A one-way ANOVA was performed on each individual experiment using Tukey's multiple comparisons test. Different letters indicate significant differences between groups (P < 0.01). Error bars SEM.

f. In situ hybridization and quantification for BMAL2 mRNA from archived material from collected every 4 hours from SP and LP. Representative images are shown (n = 4). Error bars represent the SD. Statistical analysis by one-way ANOVA performed, different letters indicate significant differences between groups (P < 0.01).

212

213

214 ***A repressive arm of the circadian clock in SP shuts down the LP***  
215 ***transcriptome***

216 A prediction from a coincidence timer model is that repressive mechanisms  
217 would emerge on short photoperiods in the late night (i.e. photo-inducible phase  
218 masked by darkness). To assess this we conducted a serial RNA-seq  
219 experiment on PT tissue collected over at 4-hour intervals from both SP and  
220 LP-housed animals (Day 28 Fig. 1b & Fig. 3a). Transcripts at the two ZT0  
221 collections 24h apart (ZT0 and ZT24) in each photoperiod had virtually identical  
222 RNA-seq profiles, validating dissection technique and down-stream analyses  
223 (Supplementary Fig. 3a & Supplementary Table 6). We identified transcripts

224 that significantly changed across the day (diurnal genes) within each  
225 photoperiod, and defined the phase, amplitude and period <sup>41</sup> (Supplementary  
226 Table 6). More transcripts were rhythmic on SP vs LP (880 vs 643 for SP and  
227 LP respectively (Fig. 3b), with striking asymmetry in the peak phase of  
228 expression on both SP and LP (Fig. 3c). Large numbers of genes were  
229 expressed on SP in late night (ZT20, 24) and on LP in the early light phase  
230 (ZT4; Fig. 3c), and surprisingly relatively few genes common to both  
231 photoperiods (250 transcripts, Fig. 3b & d), but shared genes included the  
232 canonical clock genes (Supplementary Fig. 3b).

233 Amongst diurnal genes shared across photoperiods, dawn-peaking clusters  
234 were enriched for the GO term cAMP binding activity, while the dark-onset  
235 cluster was marked by the circadian suppressor *CRY1* <sup>42-44</sup> (Fig. 3d & e,  
236 Supplementary Fig. 3c). Previous studies have shown *CRY1* is directly induced  
237 by onset of melatonin secretion <sup>17,45-47</sup> and that the pattern of induction does  
238 not alter between photoperiods. We also observed that regulators of *CRY1*  
239 protein stability, *FBXL3* and *FBXL21* <sup>48,49</sup>, are expressed in the PT, but here  
240 there were marked photoperiod-dependent changes in phasing for *FBXL21* (Fig.  
241 3e) .

242 *BMAL2* emerged as the only transcription factor, which showed both phase and  
243 amplitude changes in expression on LP (Fig. 3e, Supplementary Table 6). On  
244 LP there was a 4 log-fold increase in expression of *BMAL2*, with bi-phasic peaks  
245 at ZT4 and ZT20. In contrast, *BMAL1* showed no alteration in amplitude of  
246 expression, on either SP or LP (Fig. 3e).

247 At SP ZT20 we noted a strong functional enrichment for the terms negative  
248 regulation of transcription, E-box binding and co-repressor activity  
249 (Supplementary Fig. 3c & d). Within this group, we identified 8 genes with  
250 known circadian repressor function (*REVERB-α*, *DEC1*, *DEC2*, *CHRONO*,  
251 *FBXL21*, *KLF10*, *JUNB*, *GATA2* and *ERF*, Fig. 3e & Supplementary Fig. 3e).  
252 Notably 6 are circadian clock components acting through E-boxes. Cistromic  
253 analysis identified over-representation of circadian RORE, D-Box and E-Box  
254 sites on the proximal promoter regions in late-night genes on SP (ZT20) and on  
255 LP at the dark-light transition (Fig. 3f). Cluster analysis revealed 4 major

256 clusters of E-box motif-enriched genes associated with late night and dawn  
257 transition on SP (ZT20) and LP (ZT4) respectively, with *BMAL2* contained  
258 within the LP ZT4 cluster (Fig. 3g), and circadian repressor elements within the  
259 SP ZT20 peaking cluster (Fig. 3g). This led us to ask; are SP ZT20 repressors  
260 more likely to interact, and therefore potentially repress, LP ZT4 up-regulated  
261 genes. We used curated experimental protein-protein interaction (PPI)  
262 observations from the STRING database, which contain known protein-protein  
263 interactions and functional associations<sup>50</sup>. We found that LP ZT4 up-regulated  
264 genes are more enriched within the SP ZT20 repressor network (P-value =  
265 0.001) than down-regulated genes (Supplementary Fig 4a, b). We did not find  
266 significant enrichment when considering genes that are differentially up or down  
267 regulated across the whole day (P-value = 0.25) (Supplementary Fig. 4b). This  
268 suggests that SP is defined by an up-regulation of transcriptional repressors  
269 responsible for the suppression of the LP activated transcriptome.

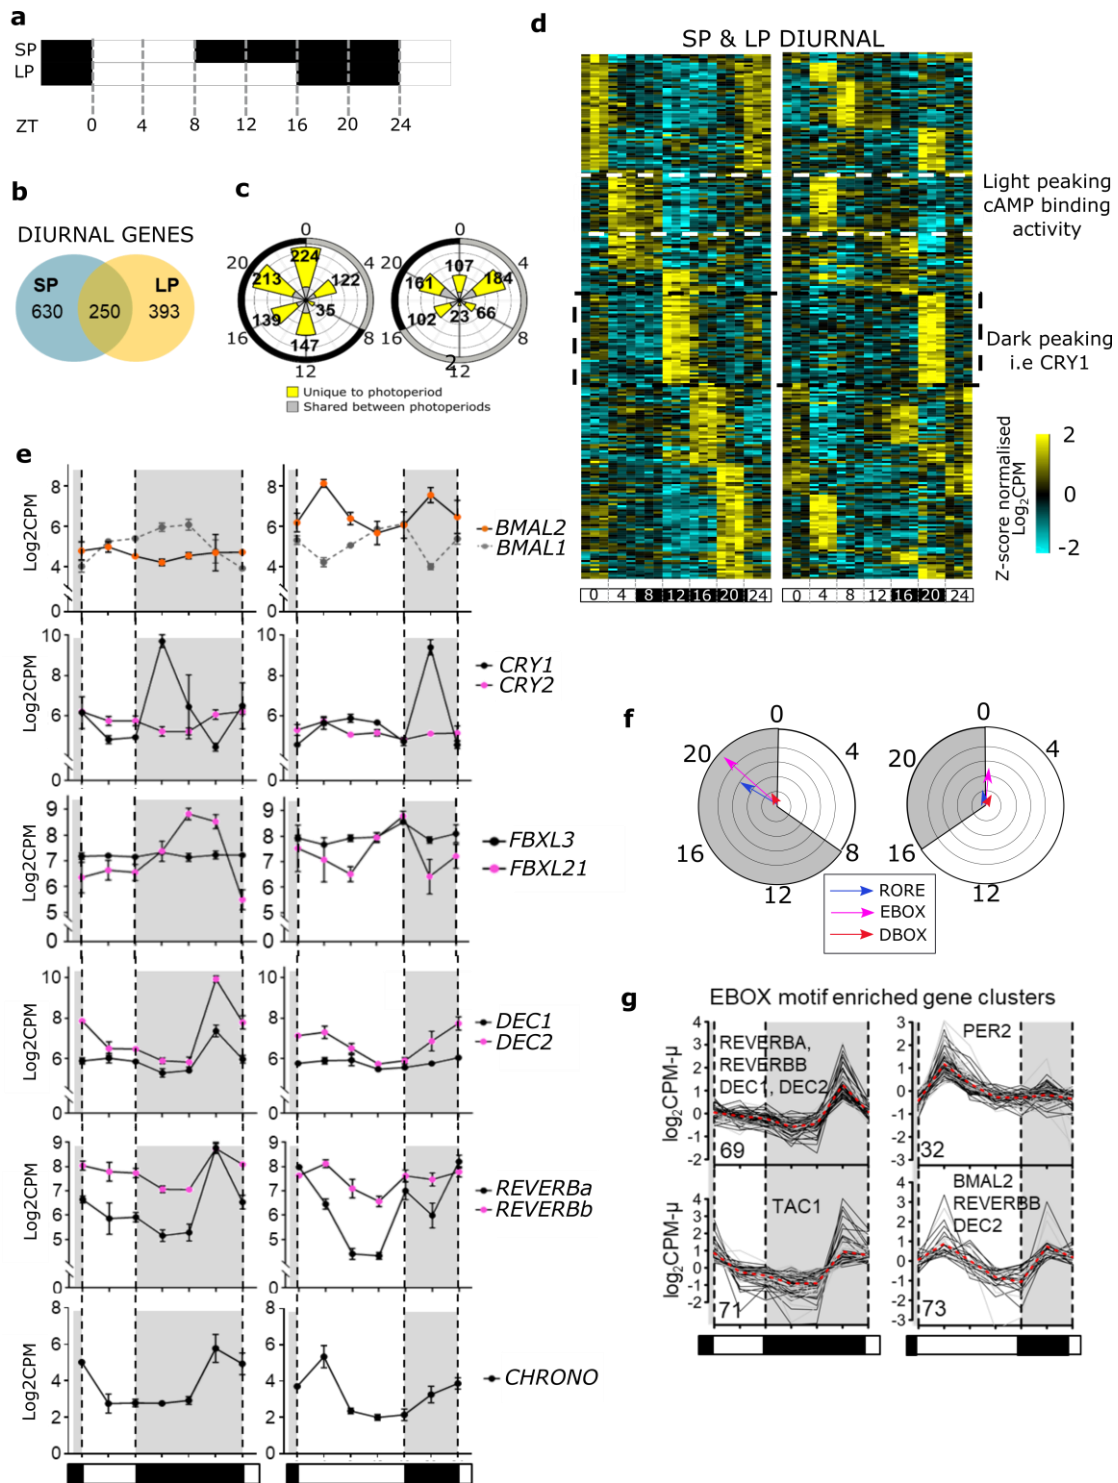

270

Fig. 3

Figure 3: Short photoperiods are defined by the expression of transcriptional repressors

a. Experimental design shown, at SP day 28 (8:16) and LP day 28 (16:8) the pars tuberalis was collected at 4 hour intervals for 24 hours, zeitgeber times (ZT) are given. N= 3 per time-point.

b. Venn diagram showing the number of diurnal genes (significantly changing throughout the day) in the PT in LP and SP (Supplementary Table 4).

c. Rose plot showing the significant diurnal genes peaking at a particular phase in LP and SP. On the rose plot bars grey indicates genes shared between photoperiods and yellow indicates they are unique to a photoperiod. Around the outside of the plot the durations of light and dark the animals received is plotted in grey and black respectively, the ZT times are also given.

d. Heatmap showing the expression profile of the genes diurnal in both SP and LP (250 genes) for each individual (n=3 per timepoint). Data are ordered by SP peak phase. Yellow is up-regulated and blue down-regulated, the data are scaled. Light dark bars are ZT times are given at the bottom of the heatmap.

e. RNA-seq log<sub>2</sub> CPM plots. Light dark bars shown at the bottom and indicated on the graph by dotted line and grey shading. Error bars are SD. Statistical significances are in Supplemental Table 6.

f. Transcription factor binding site analysis by peak phase in SP and LP. Grey and white shading show transition from dark and light and the ZT times are given. Blue arrows represent enrichment of RORE sites in genes peaking at the indicated phase. The pink arrow represents E-boxes and the red D-boxes. The direction of arrows indicate the mean expression peak of genes containing the motif in their promoter and the length of the arrow is the -log<sub>10</sub> p-value from a Rayleigh tests of uniformity.

g. Cluster analysis of the RNA-seq data identified ZT20 SP peaking and ZT4 LP peaking gene clusters that were enriched for E-boxes. Plots shown are mean normalised log<sub>2</sub>CPM of expression profiles to visualise cluster trends. The number of genes in each cluster is indicated in the bottom left of each plot. The light dark bars are shown at the bottom and indicated by dotted lines and grey shading. The broken red line represents the most representative medoid gene in the cluster.



## 272 **Melatonin-regulated circadian repression**

273 Earlier studies have defined the role for melatonin both as an acute inducer of  
274 *CRY1*<sup>17,36,45,47</sup>, but also determined clear melatonin duration-dependent effects  
275 for photoperiodic responses<sup>8,51</sup>. Our data suggest that prolonged SP-like  
276 signals may trigger late-night induction of a separate cohort of circadian  
277 repressors genes. To test this, we maintained a cohort of animals on LP and  
278 then transferred animals to constant light (LL), a regimen known to suppress  
279 the endogenous rise in pineal melatonin secretion<sup>52</sup>. Simultaneously, and at  
280 the time of normal lights off (i.e. expected onset of the melatonin signal) we  
281 treated animal with an intradermal “Regulin” melatonin implant<sup>47</sup>, which mimics  
282 the endogenous dark-onset rise of this hormone<sup>53</sup>, validated by RIA for  
283 melatonin (Supplementary Fig. 5a, n=6). PT tissue was collected for in-situ  
284 hybridization analysis at +1.5 hours (ZT17.5), +3.5 hours (ZT19.5), +6.5 hours  
285 (ZT22.5) and +9.5h after hormone treatment, the latter time point being  
286 equivalent to 1.5 hours into the predicted light-onset phase on LP (i.e. ZT1.5;  
287 Fig. 4a, n=4).

288 *CRY1* expression in the PT was completely suppressed by constant light, but  
289 rapidly induced by melatonin treatment, as previously observed<sup>17,45-47</sup> (Fig. 4b).  
290 By ZT1.5, expression levels had dropped to basal. In LL conditions *DEC1*,  
291 *REVERB $\alpha$*  and *CHRONO* were rapidly elevated in the early “subjective dark”  
292 phase, and in an abnormal pattern when compared to endogenous profiles in  
293 LP conditions (Fig. 3e vs Fig 4c-e). In marked contrast, exposure to melatonin  
294 initially repressed all 3 genes, which peaked at +9.5h, equivalent to ZT1.5 on  
295 LP (Fig.s 4c - e). For *DEC1* and *CHRONO*, this pattern closely resembled the  
296 phase of the endogenous rise of these genes in animals housed in SP  
297 photoperiods (Fig. 3e & 4f). From this, we conclude that multiple repressor arms  
298 of the circadian clock are direct melatonin targets and act as a read-out of long  
299 duration melatonin signals. This defines a molecular basis for a hormone-  
300 regulated circadian-based coincidence timer mechanism, capable of  
301 discriminating LP and SP responses within the melatonin target tissue.

302

303

304 ***DEC1 suppression of EYA3 activation by BMAL2***

305 DEC proteins are known E-box suppressors of the circadian clock <sup>54</sup>, so we  
306 selected DEC1 for further analysis. Quantitative in-situ hybridization confirmed  
307 the temporal pattern of *DEC1* expression (Fig. 4f) in the PT, and using  
308 immunohistochemistry of short-photoperiod derived PT tissue, we showed co-  
309 localisation of DEC1 protein to  $\alpha$ GSU expressing thyrotroph cells in the PT (Fig.  
310 4g). DEC1 appears to be specific to thyrotrophs, and was not detected in a  
311 common cell-type in the PT, the folliculo-stellate cells. We cloned ovine *DEC1*,  
312 and then tested action on BMAL2-mediated induction of *EYA3*. This showed  
313 that DEC1 significantly suppressed the action of both CLOCK /BMAL1  
314 (Supplementary Fig. 5b & c) and CLOCK/BMAL1/BMAL2-mediated expression  
315 of *EYA3* (Fig. 4h, Supplementary Fig. 5b & c). We also tested DEC2, which was  
316 without effect (Supplementary Fig. 5d). Hence, DEC1 and BMAL2 exert  
317 mutually antagonistic effects on *EYA3* expression.

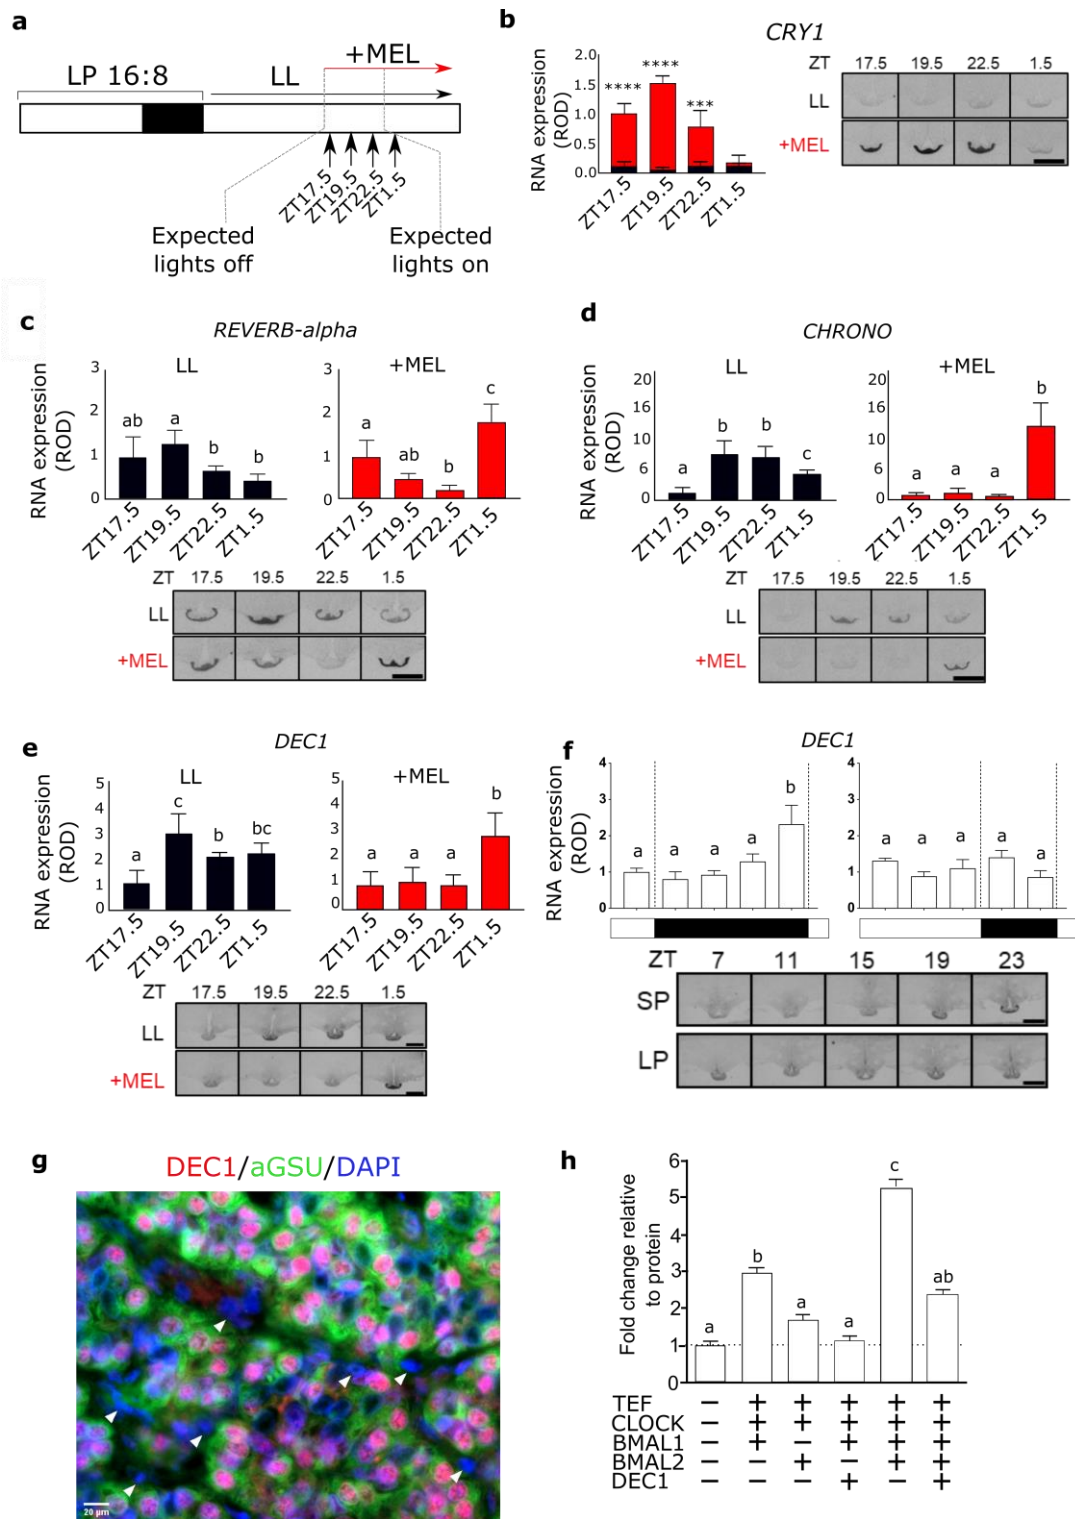

318

Fig. 4

Figure 4: Melatonin duration defines the expression of repressor genes

- a. Study design. Animals were sampled at 1.5 hour intervals with either a sham implant or melatonin implant. LL= constant light.
- b. In situ hybridization and quantification for *CRY1* mRNA. Red bars are the value in the presence of melatonin, black bars are in constant light with a sham implant. Representative images are shown (n = 4). Statistical significances from a one-way ANOVA and are between the melatonin and sham implant at each time-point. Error bars represent the SD. P-value; \* = <0.01, \*\*=<0.001, \*\*\*=<0.0001, \*\*\*\*=<0.00001
- c. In situ hybridization and quantification for *REVERB-alpha* mRNA. Red bars are the value in the presence of melatonin, black bars are in constant light with a sham implant. Representative images are shown (n = 4). Statistical analysis by one-way ANOVA performed, different letters indicate significant differences between groups (P < 0.01).
- d. As in c for *CHRONO* mRNA.
- e. As in c for *DEC1* mRNA.
- f. In situ hybridization and quantification for *DEC1* mRNA from archived material from collected every 4 hours from SP and LP. Representative images are shown (n = 3). Error bars represent the SD. Statistical analysis by one-way ANOVA performed, different letters indicate significant differences between groups (P < 0.01).
- g. Double immunohistochemistry for DEC1 (red), aGSU (green) and dapi nuclear stain (blue). White arrow heads indicate FS cells. Scale bar 20um.
- h. Transactivation of the EYA3-downstream-TSS-luc reporter by TEF, CLOCK, BMAL1 and BMAL2 is repressed by DEC1. The experiment was repeated 4 times (n=4 per experiment), plot displayed is a representative result. A one-way ANOVA was performed on each individual experiment using Tukey's multiple comparisons test. Different letters indicate significant differences between groups (P < 0.01). Error bars SEM.

## 320 Discussion

321 Our study reveals a circadian coincidence timer within the PT, sculpted by the  
322 nocturnal melatonin signal that encodes the mammalian photoperiodic  
323 response (Fig. 5). Under LP, *BMAL2* exhibits a high-amplitude peak timed  
324 approximately 12h after the onset of the preceding dark phase, coincident with  
325 expression of *EYA3* in the early light phase<sup>22</sup>. This 12h interval from dark onset  
326 to the dawn peak is also remarkably close to the critical photoperiod required  
327 to activate a long-day response in sheep<sup>28,55</sup>. We show that *BMAL2* acts as a  
328 co-activator of *EYA3* with *CLOCK* and *BMAL1*, likely in a complex through the  
329 PAS-B domain interaction<sup>56</sup>. Co-activators are recognized as important rapid-  
330 response functional integrators of multiple transcription factors, driving distinct  
331 biological programmes and environmental responses, including adaption to  
332 cold, rapid diet change and disease<sup>38</sup>. Within the PT, *BMAL2* and *EYA3* may  
333 therefore operate as a photoperiodic co-activator cascade. It remains unclear  
334 how *BMAL2* is regulated, and current models for the regulation of *BMAL2* by  
335 *BMAL1* may not be applicable<sup>57</sup>. Our promoter motif analysis does indicate the  
336 presence of E-boxes in *BMAL2* but this presents a circular argument and further  
337 work on the regulation and evolution of *BMAL2* function is required.

338 While we cannot differentiate between an internal or external coincidence  
339 model of photoperiodic time measurement in this study, generally the concept  
340 of a photoperiodic coincidence timer predicts that on short photoperiods,  
341 repressor activity would dominate in the late night. In line with this we show  
342 that long-duration melatonin signals elicit repressor gene transcription in the  
343 late night, timed approximately 12h after dark onset/rise of melatonin (ZT20 SP).  
344 Impressively, these repressors are directly implicated in the negative regulation  
345 of LP ZT4 induced genes (Supplementary Fig. 4). Amongst these, we show the  
346 circadian repressor *DEC1*<sup>58</sup> blocks induction, by *BMAL2*, of *EYA3*. Therefore,  
347 *DEC1* and *BMAL2* act as a circadian flip-flop switch for photoperiodic time  
348 measurement (Fig. 5). It remains unclear whether *DEC*-mediated repression is  
349 via a direct action on E-box sites occupied by *BMAL2* or indirect, leading to  
350 modification of a co-activator complex. The discovery of transcriptional  
351 repressors in the latter half of the night on SP contrasts with previously  
352 described acute and photoperiod-independent induction of *CRY1* by melatonin

353 onset<sup>17,36,45,47</sup>. However, constant light and therefore CRY1 repression seems  
354 to induce the “late-night repressor genes”, suggesting that these are direct  
355 targets of CRY1-mediated repression in the early to mid nocturnal phase. This  
356 observation along with altered phasing by photoperiod of the CRY1 protein  
357 stability regulator FBXL21<sup>48,49</sup> indicate that the dynamics of protein degradation  
358 of CRY1 could play a role in discriminating melatonin signal duration.

359 Our study reveals a progressive increase in H3K4me3 marks at transcription  
360 start sites of seasonally expressed genes, especially in long photoperiods (Fig.  
361 1d & Supplementary Fig. 1h). Furthermore, these long photoperiod induced  
362 genes are more likely to have multiple transcription start sites marked with  
363 H3K4me3 (Supplementary Fig. 1g & h). *EYA3* is a particular example of this  
364 showing seasonal regulation of only one out of two transcription start sites,  
365 presumably seasonally modulating the transcription of *EYA3* via *BMAL2*. On  
366 transfer to long photoperiods the *EYA3* and *TSH $\beta$*  locus show a progressive  
367 increase over a number of weeks in H3K4me3 marks matching the increase in  
368 expression (Fig. 1f-i & Supplementary Fig. 2e). Our earlier work shows that at  
369 the individual cell level the transition between winter and summer physiology is  
370 a binary, all-or-nothing phenomenon<sup>29,59</sup>. Integrating these two findings, we  
371 suggest that individual thyrotroph cells of the PT exhibit a distribution of critical  
372 day length requirements/sensitivity for circadian triggering of the summer  
373 physiology leading to a binary switch in cell phenotype, which in a whole tissue  
374 assay would appear as a progressive change in epigenetic status.

375 We therefore envisage a photoperiodic time measurement model in which a  
376 melatonin-regulated circadian-based interval timer interacts with the underlying  
377 cellular chromatin state, rhythmically recapitulating the final developmental  
378 stages of a thyrotroph endocrine cell in response to long days, leading to an  
379 adaptive summer-like physiological state. Defining how a “flip-flop” circadian  
380 timer (Fig. 5) interacts with the chromatin state at the level of the single PT cell  
381 remains a future challenge.

382 In summary, the use of photoperiod to synchronise life history cycles in a  
383 variable environment is an ancestral feature observed in a large majority of  
384 species. The *EYA3*-*TSH* circuitry is conserved amongst vertebrates<sup>9,13,16,21</sup>, as

385 is the use of a circadian/coincidence based system for photoperiodic time  
386 measurement <sup>2,4-7</sup>. Here, we have defined how photoperiodic changes in  
387 EYA3/TSH expression stem from a molecular circadian coincidence timer  
388 mechanism. We expect this model to be widely applicable across the vertebrate  
389 lineage.

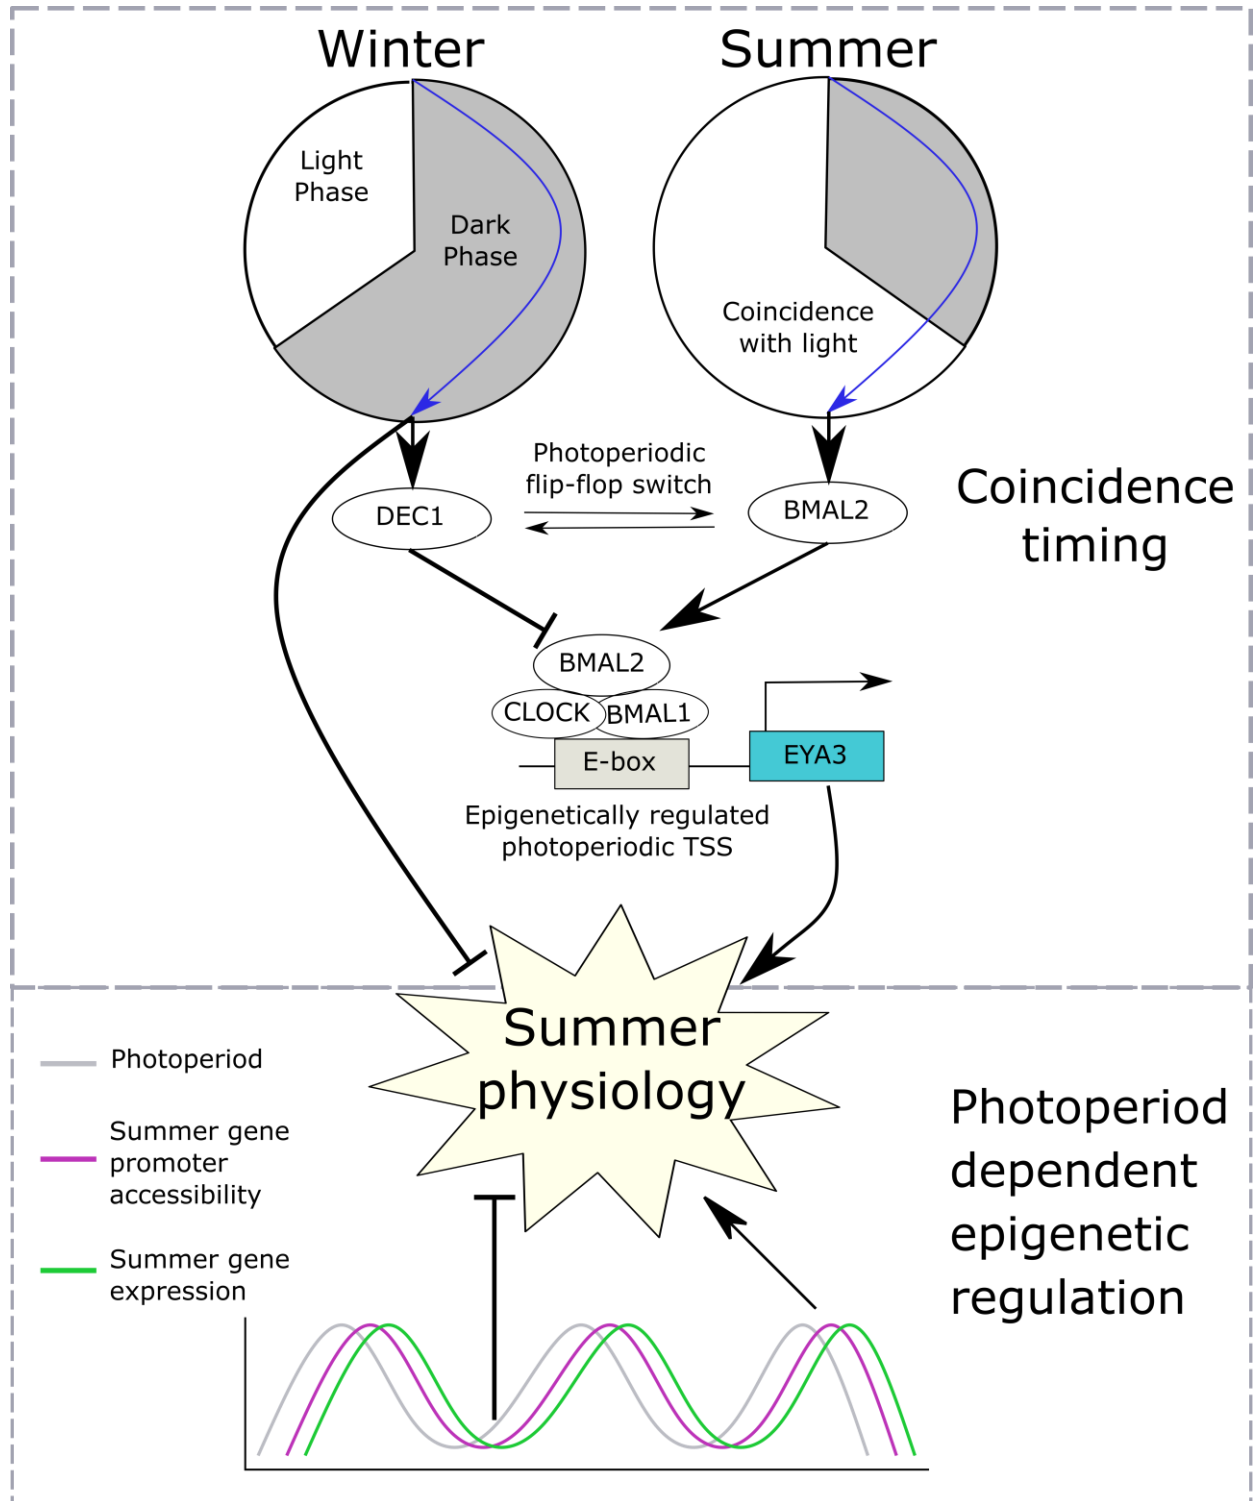

390

Figure 5: Model for coincidence timing and epigenetic regulation in mammalian photoperiodism

The photoperiod sculpts the duration of the melatonin signal, long duration on short photoperiods (SP, winter) and short duration on long photoperiods (LP, summer). In the pars tuberalis approximately 12 hours after the onset of darkness there is a photosensitive phase. When this phase coincides with light BMAL2 is expressed. When this phase is coincident with darkness DEC1 is expressed. This forms a photoperiodic flip-flop switch between two stable states. The role of BMAL2, CLOCK and BMAL1 is to co-activate EYA3 and subsequently seasonal physiological changes. DEC1 suppresses the E-box based activation of EYA3. Also occurring in the dark phase of SP a number of repressors are expressed which target appear to target LP induced genes potentially inhibiting the expression of summer physiology. Aside from this acute photoperiodic flip-flop switch there is a progressive photoperiod dependent epigenetic regulation over a number of weeks augmenting the coincidence based timer drive on summer physiology.



## 392 **Methods**

### 393 *Animals & experimental design*

394 All animal experiments were undertaken in accordance with the Home Office  
395 Animals (Scientific Procedures) Act (1986), UK, under a Project License held  
396 by A.S.I.L. Scottish blackface castrate males were housed in artificial light dark  
397 cycles, either 8:16 h light/dark cycle for short photoperiod (SP) or 16:8 h light  
398 /dark cycle for long photoperiod (LP).

399 Two separate photoperiod controlled studies were undertaken; 1. The  
400 experiment presented in Fig. 1b (seasonal comparison) & Fig. 3a (diurnal  
401 comparison at day 28), and, 2. The experiment presented in Fig. 4a (melatonin  
402 implant study). Animals were blood sampled throughout the study and  
403 terminally sampled at the indicated time-points (Figure 1b, 3a, 4a). The  
404 seasonal experiment was designed to take into account the effects of a  
405 photoperiodic switch from SP (SP day 84) to LP and the progressive seasonal  
406 changes (LP day 1, 7, 28 and 112), followed by return to SP (SP day 1, 7, 28).  
407 Animals were terminally sampled at ZT4 at all time-points. The diurnal  
408 comparison was conducted on day 28 animals from this study, they were  
409 sampled across the day at 4 hourly intervals for 24 hours. The melatonin implant  
410 study was a separate experiment on pre-conditioned LP animals (8 weeks).

411 All animals were killed by an overdose of barbiturate (Euthatal; Rhone Merieux,  
412 Essex, UK) administered intravenously. Hypothalamic blocks with the *pars*  
413 *tuberalis* (PT) and pituitary attached were collected for immunohistochemistry  
414 (n=3 per group), electron microscopy (n=3 per group), transcriptomics (n=3 per  
415 group), insitu-hybridization (n=4 per group) and epigenomics (n=2 per group).  
416 From the omic analyses the PT was dissected to minimise inclusion of transition  
417 zone and median eminence. The PT samples were snap frozen on dry ice and  
418 stored at -80C.

### 419 *Hormone assays*

420 Ovine prolactin (oPRL) was measured as in our previous study<sup>29</sup> for 30 animals  
421 during the seasonal experiment (Fig. 1b). In brief, a competitive ELISA using  
422 purified oPRL (ovine prolactin NIDDK-oPRL-21; AFP10692C; from Dr. A Parlow,

423 NHPP, Harbor-UCLA Torrance CA, USA) and a highly specific rabbit anti-ovine  
424 prolactin (ASM-R50, produced by ASM) were used. Plates were read at 450nm.  
425 The Coefficient of Variation for the assay on control plasma samples was <10%.

426 Ovine melatonin was measured by radioimmunoassay as previously described  
427 <sup>47</sup> for animals in the melatonin implant study (Fig. 4a, n=6 per timepoint). In brief,  
428 using a rabbit antimelatonin antiserum (PF1288; P.A.R.I.S., Paris, France) and  
429 2-Iodomelatonin (NEX236050UC; PerkinElmer, Boston, Massachusetts) as  
430 tracer RIA was performed. All samples were assayed in a single assay with an  
431 intra-assay coefficient of variation of 5% and a sensitivity of 5 pg/mL.

### 432 *Immunohistochemistry*

433 Tissues (n=3 per group) were immersed in Bouin's fixative for 8 hours,  
434 transferred to 70% ethanol, then dehydrated and embedded in paraffin wax.  
435 Sagittal sheep brain sections were cut from paraffin embedded tissue at 5  $\mu$ M,  
436 floated onto Superfrost Plus slides (J1800 AMNZ, Thermo scientific), dried at  
437 50°C overnight, then dewaxed and rehydrated. Triple immunofluorescence for  
438 TSHb, CHGA and EYA3, and the double immunofluorescence for DEC1 / $\alpha$ GSU  
439 was performed as in our previous study <sup>29</sup>.

440 DEC1 primary antibody (CW27, gift from Prof. Adrian L Harris, Weatherall  
441 Institute of Molecular Medicine, John Radcliffe Hospital, Oxford) <sup>60</sup> was used at  
442 1:2000. 1:1000 diluted horse radish peroxidase conjugated chicken anti-rabbit  
443 IgG antibody was used as a secondary antibody (PI-1000, Vector Laboratories).  
444 TSA Plus Cyanine 5 (NEL763001KT, Perkin Elmer) was used to visualize.  
445  $\alpha$ GSU immunofluorescence was used at 1:2000 diluted, ASM-HRSU, R20) and  
446 treated with TSA Plus Fluorescein (NEL741001KT, Perkin Elmer). Nuclei were  
447 stained by Hoechst 33258 (ab228550, abcam) and cover glasses were  
448 mounted by VectaMount AQ (H-5501, Vector Laboratories). Images were  
449 collected on a Zeiss Axioimager.D2 upright microscope using a 40x / 0.7 Plan  
450 neofluar objective and captured using a Coolsnap HQ2 camera (Photometrics)  
451 through Micromanager Software v1.4.23. Images were then processed using  
452 Fiji ImageJ (<http://imagej.net/Fiji/Downloads>).

### 453 *In Situ Hybridization (ISH) and Quantification of Signal*

454 The OaTSH $\beta$  plasmid (XM\_004002368.2) was kindly provided by David  
455 Hazlerigg. The OaEya3 plasmid (NM\_001161733.1) was cloned as previously  
456 described <sup>22</sup>. The OaCHGA, OaDEC1, OaREVERB-alpha, CHRONO and  
457 OaBMAL2 were cloned as 1,948-1,970 of XM\_004017959.4, 407-767 of  
458 NM\_001129741.1, 1,012-1,411 of NM\_001131029.1, 83-532 of  
459 XM\_027974329.1, and 1,518-1,906 of XM\_027965976.1, respectively.

460 Frozen coronal ovine hypothalamic blocks (n=4 per group) for in-situ  
461 hybridization were cut into 16 $\mu$ m sections using a cryostat (CM3050s Leica  
462 Microsystems, Ltd., Milton Keynes, UK), and thaw mounted onto poly-L-lysine  
463 coated slides (VWR International, Lutterworth, UK). Radiolabelled cRNA  
464 riboprobes were prepared by plasmid linearization and transcribed using P33  
465  $\alpha$ -UTP (Perkin-Elmer). Fixed sections were hybridized overnight at 60°C with 5  
466 x 10<sup>5</sup> cpm of probe per slide. Hybridization signals were visualised on  
467 autoradiographic film (Kodak Biomax MR Films, Kodak, USA) after one week  
468 exposure at -80°C. Signal intensity was quantified by densitometry analysis of  
469 autoradiographs using the image-Pro Plus 6.0 software (Media Cybernetics,  
470 Inc., Marlow, UK).

#### 471 *Tissue processing and electron microscopy (EM)*

472 Hypothalamo-pituitary tissue blocks were fixed by immersion in 3%  
473 paraformaldehyde/0.05% paraformaldehyde in 0.1M phosphate buffer (pH 7.2)  
474 for 24 hours at room temperature and transferred to a 1:10 dilution of the fixative  
475 in 0.1M phosphate buffer for storage at 4°C before processing (n=3 per group).  
476 Using a scalpel blade, areas from the medial PT and median eminence were  
477 cut into 0.5mm<sup>3</sup> pieces which were then stained with osmium (1% in 0.1M  
478 phosphate buffer), uranyl acetate (2% w/v in distilled water), dehydrated  
479 through increasing concentration of ethanol (70 to 100%), followed by 100%  
480 acetone and embedded in Spurr's resin (TAAB laboratory equipment,  
481 Aldermarston, UK). Ultrathin sections (50-80 nm) were prepared using a  
482 Reichart-Jung Ultracut ultramicrotome and mounted on nickel grids (Agar  
483 Scientific Ltd., Stanstead, UK). Sections were then counterstained with lead  
484 citrate and uranyl acetate and examined on a JOEL 1010 transmission electron

485 microscope (JOEL USA Inc., Peabody, MA, USA). Sections from 3 animals per  
486 group were examined.

487 For analysis of PT cell morphology, twenty micrographs per animal (n=3 sheep  
488 per group) of individual PT cells were taken at a magnification of x 5,000.  
489 Negatives were scanned into Adobe Photoshop CS2 (Adobe Corp., San Jose,  
490 CA, USA) and analysed using Axiovision version 4.5 (Zeiss, Oberkochen,  
491 Germany) image analysis software. The analyst was blind to the sample code.  
492 For measurement of the cell and nuclear areas, margins were drawn around  
493 the cell or nucleus respectively and the area was calculated. All morphometric  
494 values represent the mean  $\pm$  SEM (n=3 sheep per group). Means were  
495 compared by one way analysis of variance (ANOVA) with post hoc analysis by  
496 the Bonferroni test.  $P < 0.05$  was considered statistically different.

#### 497 *RNA-seq*

498 RNA was extracted from the pars tuberalis from the seasonal experiment  
499 (including the diurnal samples)(Fig1b & Fig. 3a) using Qiagen's TissueLyser II  
500 and RNeasy tissue kit (n=3 per group). The quality of the extracted RNA was  
501 assessed using the Agilent 2100 Bioanalyser; all RNA integrity numbers (RINs)  
502 were above 8, indicating that good quality RNA had been extracted. Poly-A  
503 selection was used.

504 RNA was prepared with TruSeq Stranded mRNA Sample Preparation Guide,  
505 (15031047 Rev. E, Oct 2013) and sequenced on HiSeq 2500 with 125 base  
506 pair paired-end reads by Edinburgh Genomics.

507 The FASTQ files were trimmed with TrimGalore v0.4.0 and mapped (TopHat<sup>61</sup>  
508 v2.1.0 and Bowtie<sup>62</sup> v2.3.5) to the 5<sup>th</sup> release of the sheep genome  
509 (Oar\_rambouillet\_v1.0; assembly GCA\_002742125.1). StringTie<sup>63</sup> was used to  
510 combine RNASeq and IsoSeq full-length transcripts to generate the genome  
511 transcript annotation (accessible in GEO, GSE144677). On average 90%  
512 (sdev: 8.46) of paired reads generated were mapped to the genome and 73%  
513 (stdev: 0.03) of these were assignable to genes using featureCount<sup>64</sup> (Subread  
514 v1.6.3).

515 All sequence data have been submitted to SRA under the BioProject accession  
516 PRJNA391103 and processed data to GEO under GSE144677.

517 A limma-voom<sup>65</sup> analysis pipeline was used to determine the statistical  
518 significance of differential expressed genes. Voom was used to generate  
519 normalized precision weighted counts per million (CPM) values which were  
520 used in the following regression analyses.

#### 521 *Seasonal comparison*

522 The effect of switching from SP to LP was assessed by comparing SP day 84  
523 to LP day 1, 7 and 28, and the effect of switching from LP to SP was assessed  
524 by comparing LP day 112 to SP day 1, 7 and 28 (Fig. 1b, Supplementary Table  
525 3). For each gene, we fit a least squared regression model with limma that  
526 calculates a single f-test for significance across all model coefficients (mitigating  
527 type I errors). Time (days) was treated as a categorical independent variable  
528 model for all ZT4 observations in LP and SP (photoperiod x day) in limma and  
529 which allowed us to extract from the model the fold change and significance for  
530 each pairwise contrasts of interest in limma (Supplemental Table 3; Figure  
531 2a,b). Significance was determined by an FDR < 0.05, >0 log<sub>2</sub>CPM and a >1  
532 log<sub>2</sub> absolute fold change.

#### 533 *Diurnal comparison*

534 To test for diurnal changes, samples collected at day 28 in LP and SP at a 4hr  
535 time resolution were used (n=3 per group, 7 time-points, Fig. 3a). We used a  
536 polynomial regression model approach similar to that of maSigPro<sup>66</sup>. Least  
537 squared regression models were then fitted with orthogonal polynomials up to  
538 the 5<sup>th</sup> order for time in each photoperiod to identify significantly changing genes.  
539 To test for rapid single time-point changes in gene expression a categorical  
540 regression model was also fitted to this dataset. Diurnal genes that were  
541 significantly changing across time were identified as FDR significance <0.05,  
542 log<sub>2</sub>CPM > 0 and absolute log<sub>2</sub> fold change > 1 (Supplementary Table 6; Figure  
543 3b,c,d). FDR was calculated throughout using the Benjamini & Hochberg  
544 method. Gene expression changes between photoperiods were evaluated by  
545 fitting a photoperiod x time (orthogonal polynomials up to 5<sup>th</sup> order) model and

546 extracting the significance and effect size from photoperiod coefficient of the  
547 linear model (Supplementary Table 6). In selecting the polynomial we used  
548 Akaike information criterion (AIC) to investigate the optimal model selection for  
549 expressed genes, balancing model overfitting and underfitting (using the  
550 Oshlack and Gordon selectModel implementation in limma). It is not possible to  
551 select a single model that is optimal across all genes, however for genes  $> 0$   
552  $\log_2\text{CPM}$  and with an amplitude  $> 1.5$  we found that including orthogonal  
553 polynomials up to 5th order was optimal for the most genes in both SP and LP  
554 time-series. Again we used the thresholds FDR significance  $< 0.05$ ,  $\log_2\text{CPM} >$   
555  $0$  and absolute  $\log_2$  fold change  $> 1$  (Supplementary Table 6). MetaCycle<sup>67</sup>  
556 v1.1.0 was used to evaluate gene expression in the 24hr time series for  
557 periodicity. JTKCycle<sup>41</sup> and Lomb-Scargle statistics were calculated for an  
558 assumed period of 24 hours (Supplementary Table 6). Rayleigh tests for  
559 uniformity were performed with the CircStats 0.2-6 package in R. We tested the  
560 uniformity of distribution of peak expression times for genes containing each of  
561 the core clock motifs (canonical EBOXs (CACGTG), DBOXs  
562 (TTA[CT][GA]TAA) and RORE sites (AANTAGGTCA)) within the H3K4me3  
563 marked region proximal (within 500bp) of the TSS.

564 For all gene cohorts described enrichment analysis of GO terms and pathways  
565 was conducted using both consensusPathDB<sup>68</sup> and TopGO<sup>69</sup> 3.1.0. Significant  
566 terms extracted by a FDR  $< 0.05$  from a fishers exact test. The weight01  
567 algorithm was used for GO term weighting in TopGO. Where gene annotation  
568 did not yet exist for novel and unannotated transcripts OrthoMCL<sup>70</sup> v5 was used  
569 to predict orthology from protein sequences and annotation, which were then  
570 used to transfer annotation from cow, human, mouse and rat genes. Protein  
571 sequences were predicted from novel transcripts using TransDecoder v5.3.0  
572 guided by Uniprot<sup>71</sup> and Pfam<sup>72</sup> best hits to rank coding frames.

573 We clustered SP and LP time-series profiles using Partitioning Around Medoids  
574 (PAM) (Fig. 3g) with the cluster 2.1.0 package in R. Day 28, 24 hour, time-series  
575 were mean normalized and scaled and PAM clustered with Euclidian distance.  
576 The Davies Bouldin index was used to evaluate the optimum number of clusters  
577 ( $k=15$  SP and  $k=9$  LP). Motif enrichment of genes clusters was evaluated using  
578 fishers two-way exact test against all PT expressing genes as the background.

579 Motifs we identified within H3K4me3 marked regions within 500bp of a  
580 candidate TSS assigned to a gene.

### 581 *ChIP-seq*

582 The method used for ChIP-seq was adapted from an ultra low cell number  
583 native ChIP method<sup>73</sup>. In brief, nuclei were isolated from whole PT tissue (n=2  
584 per group) with a dounce homogenizer and sigma nuclear isolation buffer.  
585 Mnase digestion was optimized to to give the best discrimination between mono,  
586 di and tri histones. Immunoprecipitation was performed with protein A and G  
587 beads (Invitrogen). Importantly the beads were pre-incubated with the  
588 H3K4me3 antibody (active motif) to reduce background noise. Stringent  
589 washing with salt buffers was also used to reduce the background noise. The  
590 bound chromatin was elute and extracted using a phenol chloroform method.  
591 Ampure bead purification was used to clean up the samples. The qubit and  
592 tapestation were used to quantify, a minimum amount of 5ng was required for  
593 the library preparation. The Manchester genomic facility prepared the ChIP-seq  
594 libraries and sequenced them according to the standard illumina protocol.

595 Massive parallel sequencing were performed by Illumina HiSeq4000 with 75 bp  
596 paired-end and converted fastqs by bcl2fastq (ver 2.17.1.14). Fastqs were  
597 trimmed by trimmomatic (ver 0.36)<sup>74</sup> with the following parameters,  
598 ILLUMINACLIP: TruSeq3-PE-2.fa:2:30:10 SLIDINGWINDOW:4:20  
599 MINLEN:35, aligned to the sheep genome (Oar\_rambouillet\_v1.0) by BWA  
600 MEM (ver 0.7.17)<sup>75</sup> with the default parameter and then converted to BAM and  
601 sorted by samtools (ver 0.1.19). Peak calling were carried out by MACS2 (ver  
602 2.1.0)<sup>76</sup> with following parameters, --format BAMPE --gsize 2.81e9 --keep-dup  
603 1 --broad --broad-cutoff 0.1 --bdg --SPMR --qvalue 0.05.

604 Read coverages of peaks were calculated by SICER (ver 1.1)<sup>77</sup> with following  
605 parameters; window size=200, gap length=200, fdr=0.01. BED files of replicate  
606 samples were merged in order to perform SICER analysis which does not allow  
607 replicates. Peaks called by SICER were annotated by HOMER (ver 4.10.3)<sup>78</sup>  
608 with default parameters. H3K4me3 peaks identified by SICER were validated  
609 by monitoring the distributions on the sheep genome. By HOMER annotation,  
610 each peak was described as promoter-TSS (1000 bp from TSSs), exon, intron,

611 TTS, intergenic and the distributions of H3K4me3 peaks were closely  
612 resembling to the previous reports<sup>33,34</sup> (Supplementary Fig. 6a). Furthermore,  
613 H3K4me3 peaks were well-associated with CpG islands (CGIs) on the sheep  
614 genome as described in the previous study (Supplementary Fig. 6b)<sup>35</sup>. We use  
615 a standard definition of CpG islands<sup>79</sup>; nucleotides regions with > 50% GC  
616 content, extending to > 200 bp and with an observed vs expected CpG ratio  
617 >6.5, and detected them using CgiHunterLight 1.0 on Oar\_rambouillet\_v1.0  
618 (assembly GCA\_002742125.1). H3K4me3 peaks of each sampling day were  
619 shuffled by bedtools shuffle (ver 2.27.1)<sup>80</sup> with -noOverlapping as negative  
620 controls. For correlation analysis with RNA expression, ChIP read counts of  
621 peaks overlapped in  $\pm$  200 bp from TSSs were used. A workflow diagram can  
622 be found in Supplementary Fig. 7.

### 623 *Iso-seq*

624 For gene annotation, five tissue samples were sequenced over two  
625 experimental runs using PacBio Iso-Seq. In the first run PT and PD samples  
626 were sequenced from an RNA pool of SP and LP Scottish blackface sheep  
627 (N=1) and a pineal from a commercial mule sheep from Manchester, UK. This  
628 RNA was sent to GATC Biotech (Konstanz, Germany) for cDNA library  
629 preparation using their in-house method with mRNA 5' cap and poly(A) tail  
630 selections and sequencing on a PacBio RSII system. GATC made full length  
631 normalized RNA libraries. size selected for <2kb, 2kb-4kb, >4kb. sequenced  
632 across 75 PacBio RS II SMRT cells (SRX7688275). In a second run, PT from  
633 a pool of sheep in LP, and SP (N=3) were sequenced. RNA was extracted using  
634 RNeasy Mini Kit (Qiagen) with on-column Dnase digestion. A full-length cDNA  
635 library was constructed for each sample using the TeloPrime Full-Length cDNA  
636 Amplification Kit V1 (Lexogen) and amplified using PrimeSTAR GXL DNA  
637 Polymerase (Takara Bio) with 22 PCR cycles of 98 °C denaturation for 10  
638 seconds, 60 °C annealing for 15 seconds, and 68 °C extension for 10 minutes.  
639 PacBio SMRTbell libraries were prepared using SMRTbell Template Prep Kit  
640 1.0 and each library was sequenced on two SMRT Cells v2 LR using 20-hour  
641 movies on a Sequel platform at the IMB Sequencing Facility (University of  
642 Queensland, SRX7688271). All Iso-Seq data was first processed using  
643 software IsoSeq v3.1 to obtain full-length non-concatemer reads with at least 3



644 full sequencing passes, which were then mapped to the sheep reference  
645 genome GCA\_002742125.1 using GMAP version 2018-05-30. TAMA Collapse  
646 from the TAMA tool kit <sup>81</sup> was used to generate unique gene and transcript  
647 models, which were further merged with RNAseq-based annotation data using  
648 TAMA Merge to incorporate any transcript models that were identified by  
649 RNAseq but not Iso-Seq. Functional annotation of transcripts was carried out  
650 using Trinotate (v3.1.1).

651 Where multiple transcripts were present for an expressed gene, with more than  
652 one transcription start sites (TSS) candidate, the active proximal promoter  
653 regions were inferred by selecting contiguous H3K4me3 marked regions within  
654 100bp of a TSS.

### 655 *CAGE-seq*

656 We applied cap analysis gene expression (CAGE) to identify the location and  
657 relative expression of TSS regions of the PT across both LP and SP. When  
658 combined with IsoSeq and RNASeq derived transcript annotation this provided  
659 a comprehensive identification of TSS in the genome which allowed us to more  
660 accurately apply DNA binding motif analysis to promoter regions. Libraries were  
661 prepared according to Hazuki *et. al* <sup>32</sup> and sequenced on an Illumina HiSeq  
662 2500 using V4 chemistry on a 50 cycle Single end sequencing run. We  
663 sequenced archived RNA samples from the PT in both SP and LP (ZT4, week  
664 12) <sup>29</sup>. We also sequenced RNA from PD (both SP and LP), and Pineal for  
665 comparison as outgroups. Reads were trimmed using fastx toolkit 0.0.14 and  
666 cutadapt 1.4. Reads were mapped using BWA 0.7.17 to the 5<sup>th</sup> release of the  
667 sheep genome (Oar\_rambouillet\_v1.0; assembly GCA\_002742125.1). CAGER  
668 1.26.0 was used for processing and cluster analysis of TSS (Supplementary  
669 Table 4). We filtered reads for a mapping quality > 30 and sequencing quality  
670 > 20. Tag counts were normalised using the power law method with an alpha  
671 of 1.12 and T of 10<sup>6</sup> (determined by plotting the reverse cumulatives of PT  
672 samples). We clustering TSS with >1 TPM together using the distclu methods  
673 allowing a max distance between TSS of 20 nucleotides.

674

### 675 *Transcription factor binding site analysis*

676 Transcription Factor binding motifs were identified using the FIMO tool from  
677 MEME v4.11.4 with a p-value threshold of  $<1 \times 10^{-7}$ . for Jasper 2018 core  
678 vertebrate database. Fishers one-way exact tests for enrichment were used to  
679 identify the significance of motif enrichment within active promoter regions of a  
680 gene cohort compared to a background of all PT expressed genes ( $> 0$  CPM).  
681 Fishers two-way exact tests were applied to evaluate enrichment and depletion  
682 of motifs within active proximal promoter regions of genes with the use of SP  
683 and LP H3K4me3 marked regions within 500bp of candidate TSSs.

### 684 *Protein-protein interaction networks*

685 Using experimentally evidenced protein-protein interaction (PPI) annotation  
686 from the STRING<sup>50</sup> v10 database for cow, sheep, rat, mouse and human we  
687 integrated protein interactions in Cytoscape<sup>82</sup> with significantly changing genes  
688 in the ZT 4 SP vs ZT20 LP from the 24 hr categorical contrast, which is 12 hrs  
689 from dark/melatonin onset (Supplemental Table 6 & Supplemental Figure 4). A  
690 threshold of  $>0.4$  for confidence score in experimental evidence and a  
691 combined score of  $> 0.7$  was applied, and orphaned proteins removed from the  
692 network. The significance of enrichment of PPI repressor connected genes  
693 within up-regulated vs down-regulated genes was evaluated using fishers two-  
694 way exact tests.

### 695 *Cloning and constructs*

696 Expression plasmids: PCR fragments of the expected sizes were extracted  
697 using a gel extraction kit (Qiagen) and cloned in pGEM-T easy vector  
698 (Promega); Four to six positive clones were sequenced (MWG, United  
699 Kingdom). To generate expression constructs, a second round of PCR was  
700 performed using primers flanked by adequate restriction sites and the pGEM-T  
701 clone as template. PCR fragments were extracted as described above,  
702 digested by the adequate restriction enzymes, purified with a PCR purification  
703 kit (Qiagen) and cloned in the expression vector backbone (pCS2-HIS). In order  
704 to generate the mutant expression plasmids for BMAL2 we used the  
705 QuikChange Lightning Multi Site-Directed Mutagenesis Kit (210515, Agilent).

706 The bHLH mutant was generated by converting an arginine to alanine  
707 (OaBMAL2\_R88A) based on a mouse mutagenesis study on BMAL1<sup>37</sup>. The  
708 PAS-B mutant was made by converting a phenylalanine to arginine, and a  
709 valine to arginine (OaBMAL2\_F427R\_V439R). Based on a on a mouse  
710 mutagenesis study on BMAL1<sup>40</sup>.

711 Sanger sequencing of clones are available in Genbank for BMAL2 cds  
712 constructs (Genbank: MT001920), DEC1 cds constructs (Genbank:  
713 MT019539), DEC2 cds constructs (Genbank: MT019540), PAS-B-mutated  
714 BMAL2 cds constructs (Genbank: MT019541), bHLH-mutated BMAL2 cds  
715 constructs (Genbank: MT019542),

716 Promoter reporter constructs: a strategy identical to that described above was  
717 applied and fragments were cloned into the pGL4 basic backbone (Promega)  
718 digested with the appropriate restriction enzymes. Sequencing was performed  
719 to check accuracy of all re-amplified cloned fragments. EYA3 generic and  
720 seasonal promoter construct sequences are available on genebank (MT001921  
721 and MT001924 respectively).

722

### 723 *Cell culture, transfection and luciferase reporter assays*

724 The procedure was as previously reported<sup>22</sup>. In brief, COS-7 cells were grown  
725 in Dulbecco's modified eagle's medium supplemented with 10% fetal bovin  
726 serum, 1% penicillin/streptomycin at 5% CO<sub>2</sub> and 37°C. Cells were plated in 24-  
727 well plates at a density of 4x10<sup>4</sup> cells per ml and incubated for 24 hours prior  
728 to transfection. Transfection was performed using Genejuice (Novagen) and  
729 the concentration was optimised to transfect the greatest number of cells without  
730 compromising cell survival, this was assessed using a luciferase positive  
731 control pGL3 containing SV40 (Promega) and trypan blue staining. We  
732 recorded a 90% cell survival and a high transfection efficiency. The EYA3  
733 promoter constructs were used at 50ng per well, as in a previous study (ref).  
734 The expression plasmids were used at different doses based on a previous  
735 study and optimization of the assay: TEF = 12.5ng, DEC1 = 25ng, CLOCK,  
736 BMAL1, BMAL2 and mutant BMAL2 were all used at 50ng, unless otherwise  
737 stated. The total transfected DNA amount was set to an equal amount between

738 all conditions by addition of the corresponding empty vector. The luciferase  
739 assays were performed 48 hours after transfection using the luciferase assay  
740 kit (Promega) and the Glomax luminometer (Promega). The total protein per  
741 well, assessed by Bradford assay was used to normalize the values to total  
742 protein content (a proxy for cell number). All data (in Relative Luminescence  
743 Units, RLU) represent fold induction once normalized to total protein content  
744 and relative to an inert control transfection. Each experiment contained 4  
745 replicate wells and was repeated 4 times giving similar results. An one-way  
746 ANOVA using Tukey's multiple comparisons test was performed for each  
747 separate experiment conducted in Graphpad prism 7.05. Representative plots  
748 (n=4) are shown.

749 *Data availability statement*

750 All sequence data have been submitted to SRA under the BioProject accession  
751 PRJNA391103 and processed data to GEO under GSE144677.

752 *Code availability statement*

753 Code used is available from the authors on request.

## 754 References

- 755 1. Bünning, E. Die endogene Tagesperiodik als Grundlage der  
756 photoperiodischen Reaktion. *Ber Dtsch Bot Ges* **54**, 590–608 (1936).
- 757 2. Pittendrigh, C. S. & Minis, D. H. The entrainment of circadian  
758 oscillations by light and their role as photoperiodic clocks. *Am. Nat.* **98**,  
759 261–299 (1964).
- 760 3. Nanda, K. K. & Hamner, K. . Studies on the nature of the endogenous  
761 rhythm affecting photoperiodic response of Biloxi soybean. *Bot. Gaz.*  
762 **120**, 14–28 (1958).
- 763 4. Follett, B. K., Mattocks, P. W. & Farner, D. S. Circadian function in the  
764 photoperiodic induction of gonadotropin secretion in the white-crowned  
765 sparrow, *Zonotrichia leucophrys gambelii*. *Proc. Natl. Acad. Sci. U. S. A.*  
766 **71**, 1666–9 (1974).
- 767 5. Goldman, B. D. Mammalian photoperiodic system: formal properties  
768 and neuroendocrine mechanisms of photoperiodic time measurement.  
769 *J. Biol. Rhythms* **16**, 283–301 (2001).
- 770 6. Pittendrigh, C. S., Elliott, J. & Takamura, T. The Circadian Component  
771 in Photoperiodic Induction. in 26–47 (Wiley-Blackwell, 2008).  
772 doi:10.1002/9780470720851.ch4
- 773 7. Ikegami, K. & Yoshimura, T. Circadian clocks and the measurement of  
774 daylength in seasonal reproduction. *Mol. Cell. Endocrinol.* **349**, 76–81  
775 (2012).
- 776 8. Bartness, T. J., Powers, J. B., Hastings, M. H., Bittman, E. L. &  
777 Goldman, B. D. The timed infusion paradigm for melatonin delivery:  
778 what has it taught us about the melatonin signal, its reception, and the  
779 photoperiodic control of seasonal responses? *J. Pineal Res.* **15**, 161–90  
780 (1993).
- 781 9. Wood, S. & Loudon, A. Clocks for all seasons: unwinding the roles and  
782 mechanisms of circadian and interval timers in the hypothalamus and

- 783            pituitary. *J. Endocrinol.* **222**, R39-59 (2014).
- 784    10.    Woodfill, C. J. I., Wayne, N. L., Moenter, S. M. & Karsch, F. J.  
785            Photoperiodic Synchronization of a Circannual Reproductive Rhythm in  
786            Sheep : Identification of Season-Specific Time Cues ' Reproductive  
787            Sciences Program and Department of Physiology , University of  
788            Michigan. *Biol. Reprod.* **50**, 965–976 (1994).
- 789    11.    Lincoln, G. A. & Ebling, F. J. P. Effect of constant-release implants of  
790            melatonin on seasonal cycles in reproduction, prolactin secretion and  
791            moulting in rams. *Reproduction* **73**, 241–253 (1985).
- 792    12.    Bittman, E. L., Dempsey, R. J. & Karsch, F. J. Pineal melatonin  
793            secretion drives the reproductive response to daylength in the ewe.  
794            *Endocrinology* **113**, 2276–83 (1983).
- 795    13.    Dardente, H., Wood, S., Ebling, F. & Sáenz de Miera, C. An integrative  
796            view of mammalian seasonal neuroendocrinology. *J. Neuroendocrinol.*  
797            **31**, e12729 (2019).
- 798    14.    Lincoln, G. A. Melatonin Entrainment of Circannual Rhythms.  
799            *Chronobiol. Int.* **23**, 301–306 (2006).
- 800    15.    Wood, S. & Loudon, A. The pars tuberalis: The site of the circannual  
801            clock in mammals? *Gen. Comp. Endocrinol.* **258**, (2018).
- 802    16.    West, A. C. & Wood, S. H. Seasonal physiology: making the future a  
803            thing of the past. *Curr. Opin. Physiol.* **5**, 1–8 (2018).
- 804    17.    Johnston, J. D. *et al.* Multiple Effects of Melatonin on Rhythmic Clock  
805            Gene Expression in the Mammalian Pars Tuberalis. *Endocrinology* **147**,  
806            959–965 (2006).
- 807    18.    West, A. *et al.* Npas4 is activated by melatonin, and drives the clock  
808            gene Cry1 in the ovine pars tuberalis. *Mol. Endocrinol.* **27**, 979–989  
809            (2013).
- 810    19.    Hanon, E. A. *et al.* Ancestral TSH mechanism signals summer in a  
811            photoperiodic mammal. *Curr. Biol.* **18**, 1147–52 (2008).

- 812 20. Nakao, N. *et al.* Thyrotrophin in the pars tuberalis triggers photoperiodic  
813 response. *Nature* **452**, 317–22 (2008).
- 814 21. Nakane, Y. & Yoshimura, T. Universality and diversity in the signal  
815 transduction pathway that regulates seasonal reproduction in  
816 vertebrates. *Front. Neurosci.* **8**, 115 (2014).
- 817 22. Dardente, H. *et al.* A molecular switch for photoperiod responsiveness  
818 in mammals. *Curr. Biol.* **20**, 2193–8 (2010).
- 819 23. Masumoto, K. *et al.* Acute Induction of Eya3 by Late-Night Light  
820 Stimulation Triggers TSH $\beta$  Expression in Photoperiodism. *Curr. Biol.* **20**,  
821 2199–2206 (2010).
- 822 24. Dupré, S. M. *et al.* Identification of Eya3 and TAC1 as long-day signals  
823 in the sheep pituitary. *Curr. Biol.* **20**, 829–35 (2010).
- 824 25. Angel, A., Song, J., Dean, C. & Howard, M. A Polycomb-based switch  
825 underlying quantitative epigenetic memory. *Nature* **476**, 105–8 (2011).
- 826 26. Song, J., Irwin, J. & Dean, C. Remembering the prolonged cold of  
827 winter. *Curr. Biol.* **23**, R807-11 (2013).
- 828 27. Satake, A. & Iwasa, Y. A stochastic model of chromatin modification:  
829 Cell population coding of winter memory in plants. *J. Theor. Biol.* **302**,  
830 6–17 (2012).
- 831 28. Dardente, H., Hazlerigg, D. G. & Ebling, F. J. P. Thyroid hormone and  
832 seasonal rhythmicity. *Front. Endocrinol. (Lausanne)*. **5**, 19 (2014).
- 833 29. Wood, S. H. *et al.* Binary switching of calendar cells in the pituitary  
834 defines the phase of the circannual cycle in mammals. *Curr. Biol.* **25**,  
835 (2015).
- 836 30. Karsch, F. J., Robinson, J. E., Woodfill, C. J. & Brown, M. B. Circannual  
837 cycles of luteinizing hormone and prolactin secretion in ewes during  
838 prolonged exposure to a fixed photoperiod: evidence for an endogenous  
839 reproductive rhythm. *Biol. Reprod.* **41**, 1034–46 (1989).

- 840 31. Lincoln, G. A., Clarke, I. J., Hut, R. A. & Hazlerigg, D. G. Characterizing  
841 a mammalian circannual pacemaker. *Science* **314**, 1941–4 (2006).
- 842 32. Takahashi, H., Kato, S., Murata, M. & Carninci, P. CAGE (Cap analysis  
843 of gene expression): A protocol for the detection of promoter and  
844 transcriptional networks. *Methods Mol. Biol.* **786**, 181–200 (2012).
- 845 33. Hussey, S. G., Loots, M. T., van der Merwe, K., Mizrachi, E. & Myburg,  
846 A. A. Integrated analysis and transcript abundance modelling of  
847 H3K4me3 and H3K27me3 in developing secondary xylem. *Sci. Rep.* **7**,  
848 3370 (2017).
- 849 34. Ershov, N. I. *et al.* Consequences of early life stress on genomic  
850 landscape of H3K4me3 in prefrontal cortex of adult mice. *BMC*  
851 *Genomics* **19**, 93 (2018).
- 852 35. Rose, N. R. & Klose, R. J. Understanding the relationship between DNA  
853 methylation and histone lysine methylation. *Biochim. Biophys. Acta -*  
854 *Gene Regul. Mech.* **1839**, 1362–1372 (2014).
- 855 36. Lincoln, G., Messenger, S., Andersson, H. & Hazlerigg, D. Temporal  
856 expression of seven clock genes in the suprachiasmatic nucleus and  
857 the pars tuberalis of the sheep: evidence for an internal coincidence  
858 timer. *Proc. Natl. Acad. Sci. U. S. A.* **99**, 13890–5 (2002).
- 859 37. Hosoda, H., Motohashi, J., Kato, H., Masushige, S. & Kida, S. A BMAL1  
860 mutant with arginine 91 substituted with alanine acts as a dominant  
861 negative inhibitor. *Gene* **338**, 235–41 (2004).
- 862 38. Spiegelman, B. M. & Heinrich, R. Biological Control through Regulated  
863 Transcriptional Coactivators. *Cell* **119**, 157–167 (2004).
- 864 39. Guo, Y., Scheuermann, T. H., Partch, C. L., Tomchick, D. R. & Gardner,  
865 K. H. Coiled-coil Coactivators Play a Structural Role Mediating  
866 Interactions in Hypoxia-inducible Factor Heterodimerization. *J. Biol.*  
867 *Chem.* **290**, 7707–7721 (2015).
- 868 40. Huang, N. *et al.* Crystal Structure of the Heterodimeric CLOCK:BMAL1



- 869           Transcriptional Activator Complex. *Science* (80-. ). **337**, 189–194  
870           (2012).
- 871   41.   Hughes, M. E., Hogenesch, J. B. & Kornacker, K. JTK-CYCLE: An  
872           efficient nonparametric algorithm for detecting rhythmic components in  
873           genome-scale data sets. *J. Biol. Rhythms* **25**, 372–380 (2010).
- 874   42.   Xu, H. *et al.* Cryptochrome 1 regulates the circadian clock through  
875           dynamic interactions with the BMAL1 C terminus. *Nat. Struct. Mol. Biol.*  
876           **22**, 476–484 (2015).
- 877   43.   Maywood, E. S. *et al.* Translational switching of Cry1 protein expression  
878           confers reversible control of circadian behavior in arrhythmic Cry-  
879           deficient mice. *Proc. Natl. Acad. Sci.* **115**, E12388–E12397 (2018).
- 880   44.   Partch, C. L., Green, C. B. & Takahashi, J. S. Molecular architecture of  
881           the mammalian circadian clock. *Trends Cell Biol.* **24**, 90–99 (2014).
- 882   45.   Dardente, H. *et al.* Melatonin induces Cry1 expression in the pars  
883           tuberalis of the rat. *Mol. Brain Res.* **114**, 101–106 (2003).
- 884   46.   Dupré, S. M. *et al.* Identification of melatonin-regulated genes in the  
885           ovine pituitary pars tuberalis, a target site for seasonal hormone control.  
886           *Endocrinology* **149**, 5527–39 (2008).
- 887   47.   West, A. *et al.* Npas4 is activated by melatonin, and drives the clock  
888           gene Cry1 in the ovine pars tuberalis. *Mol. Endocrinol.* (2013).  
889           doi:10.1210/me.2012-1366
- 890   48.   Hirano, A. *et al.* FBXL21 Regulates Oscillation of the Circadian Clock  
891           through Ubiquitination and Stabilization of Cryptochromes. *Cell* **152**,  
892           1106–1118 (2013).
- 893   49.   Dardente, H., Mendoza, J., Fustin, J.-M., Challet, E. & Hazlerigg, D. G.  
894           Implication of the F-Box Protein FBXL21 in Circadian Pacemaker  
895           Function in Mammals. *PLoS One* **3**, e3530 (2008).
- 896   50.   Szklarczyk, D. *et al.* The STRING database in 2017: Quality-controlled  
897           protein-protein association networks, made broadly accessible. *Nucleic*

- 898            *Acids Res.* **45**, D362–D368 (2017).
- 899    51.    Maywood, E. S. *et al.* The effect of signal frequency on the gonadal  
900            response of male Syrian hamsters to programmed melatonin infusions.  
901            *J. Neuroendocrinol.* **4**, 37–44 (1992).
- 902    52.    Ebling, F. J., Lincoln, G. A., Wollnik, F. & Anderson, N. Effects of  
903            constant darkness and constant light on circadian organization and  
904            reproductive responses in the ram. *J. Biol. Rhythms* **3**, 365–84 (1988).
- 905    53.    Staples, L. D., McPhee, S., Kennaway, D. J. & Williams, A. H. The  
906            influence of exogenous melatonin on the seasonal patterns of ovulation  
907            and oestrus in sheep. *Anim. Reprod. Sci.* **30**, 185–223 (1992).
- 908    54.    Honma, S. *et al.* Dec1 and Dec2 are regulators of the mammalian  
909            molecular clock. *Nature* **419**, 841–844 (2002).
- 910    55.    Hazlerigg, D., Lomet, D., Lincoln, G. & Dardente, H. Neuroendocrine  
911            correlates of the critical day length response in the Soay sheep. *J.*  
912            *Neuroendocrinol.* e12631 (2018). doi:10.1111/jne.12631
- 913    56.    Gustafson, C. L. & Partch, C. L. Emerging Models for the Molecular  
914            Basis of Mammalian Circadian Timing. *Biochemistry* **54**, 134–149  
915            (2015).
- 916    57.    Bunger, M. K. *et al.* Mop3 Is an Essential Component of the Master  
917            Circadian Pacemaker in Mammals. *Cell* **103**, 1009–1017 (2000).
- 918    58.    Honma, S. *et al.* Dec1 and Dec2 are regulators of the mammalian  
919            molecular clock. *Nature* **419**, 841–844 (2002).
- 920    59.    Wood, S. H. How can a binary switch within the pars tuberalis control  
921            seasonal timing of reproduction? *J. Endocrinol.* **239**, R13–R25 (2018).
- 922    60.    Turley, H. *et al.* The hypoxia-regulated transcription factor  
923            DEC1(Stral3, SHARP-2) and its expression in human tissues and  
924            tumours. *J. Pathol.* **203**, 808–813 (2004).
- 925    61.    Kim, D. *et al.* TopHat2: accurate alignment of transcriptomes in the

- 926 presence of insertions, deletions and gene fusions. *Genome Biol.* **14**,  
927 R36 (2013).
- 928 62. Langmead, B. & Salzberg, S. L. Fast gapped-read alignment with  
929 Bowtie 2. *Nat. Methods* **9**, 357–359 (2012).
- 930 63. Pertea, M., Kim, D., Pertea, G. M., Leek, J. T. & Salzberg, S. L.  
931 Transcript-level expression analysis of RNA-seq experiments with  
932 HISAT, StringTie and Ballgown. *Nat. Protoc.* **11**, 1650–1667 (2016).
- 933 64. Liao, Y., Smyth, G. K. & Shi, W. FeatureCounts: An efficient general  
934 purpose program for assigning sequence reads to genomic features.  
935 *Bioinformatics* **30**, 923–930 (2014).
- 936 65. Law, C. W., Chen, Y., Shi, W. & Smyth, G. K. voom: Precision weights  
937 unlock linear model analysis tools for RNA-seq read counts. *Genome*  
938 *Biol.* **15**, R29 (2014).
- 939 66. Nueda, M. J., Tarazona, S. & Conesa, A. Next maSigPro: updating  
940 maSigPro bioconductor package for RNA-seq time series.  
941 *Bioinformatics* **30**, 2598 (2014).
- 942 67. Wu, G., Anafi, R. C., Hughes, M. E., Kornacker, K. & Hogenesch, J. B.  
943 MetaCycle: An integrated R package to evaluate periodicity in large  
944 scale data. *Bioinformatics* **32**, 3351–3353 (2016).
- 945 68. Kamburov, A., Stelzl, U., Lehrach, H. & Herwig, R. The  
946 ConsensusPathDB interaction database: 2013 update. *Nucleic Acids*  
947 *Res.* **41**, D793-800 (2013).
- 948 69. Alexa, A., Rahnenführer, J. & Lengauer, T. Improved scoring of  
949 functional groups from gene expression data by decorrelating GO graph  
950 structure. *Bioinformatics* **22**, 1600–1607 (2006).
- 951 70. Li, L., Stoeckert, C. J. & Roos, D. S. OrthoMCL: Identification of ortholog  
952 groups for eukaryotic genomes. *Genome Res.* **13**, 2178–2189 (2003).
- 953 71. UniProt: a worldwide hub of protein knowledge. *Nucleic Acids Res.* **47**,  
954 D506–D515 (2019).

- 955 72. El-Gebali, S. *et al.* The Pfam protein families database in 2019. *Nucleic*  
956 *Acids Res.* **47**, D427–D432 (2019).
- 957 73. Brind’Amour, J. *et al.* An ultra-low-input native ChIP-seq protocol for  
958 genome-wide profiling of rare cell populations. *Nat. Commun.* **6**, 6033  
959 (2015).
- 960 74. Bolger, A. M., Lohse, M. & Usadel, B. Trimmomatic: a flexible trimmer  
961 for Illumina sequence data. *Bioinformatics* **30**, 2114–2120 (2014).
- 962 75. Li, H. & Durbin, R. Fast and accurate short read alignment with  
963 Burrows-Wheeler transform. *Bioinformatics* **25**, 1754–1760 (2009).
- 964 76. Zhang, Y. *et al.* Model-based Analysis of ChIP-Seq (MACS). *Genome*  
965 *Biol.* **9**, R137 (2008).
- 966 77. Zang, C. *et al.* A clustering approach for identification of enriched  
967 domains from histone modification ChIP-Seq data. *Bioinformatics* **25**,  
968 1952–1958 (2009).
- 969 78. Heinz, S. *et al.* Simple Combinations of Lineage-Determining  
970 Transcription Factors Prime cis-Regulatory Elements Required for  
971 Macrophage and B Cell Identities. *Mol. Cell* **38**, 576–589 (2010).
- 972 79. Ioshikhes, I. P. & Zhang, M. Q. Large-scale human promoter mapping  
973 using CpG islands. *Nat. Genet.* **26**, 61–63 (2000).
- 974 80. Quinlan, A. R. & Hall, I. M. BEDTools: a flexible suite of utilities for  
975 comparing genomic features. *Bioinformatics* **26**, 841–842 (2010).
- 976 81. Kuo, R. I., Cheng, Y., Smith, J., Archibald, A. L. & Burt, D. W.  
977 Illuminating the dark side of the human transcriptome with TAMA Iso-  
978 Seq analysis. *bioRxiv* 780015 (2019). doi:10.1101/780015
- 979 82. Shannon, P. *et al.* Cytoscape: A software Environment for integrated  
980 models of biomolecular interaction networks. *Genome Res.* **13**, 2498–  
981 2504 (2003).

982

## 983 **Acknowledgements**

984 The authors thank Joan Docherty and the staff at the Marshall Building, Roslin,  
985 Edinburgh for expert care of their research animals. Past members of the  
986 Manchester/Edinburgh team have made contributions to discussions and  
987 offered advice, including Sandrine Dupre, and Alex West. We thank David  
988 Hazlerigg, Carrie Partch and Jean Michel Fustin for their critical review of earlier  
989 drafts of this work. The work was supported by grants from the Biotechnology  
990 and Biological Sciences Research Council UK (BB/N015584/1, BB/N015347/1,  
991 BBP013759/1) and a Human Sciences Frontier Programme Grant  
992 RGP0030/2015 Evolution of Seasonal Timers awarded to ASIL and DWB. ASIL  
993 acknowledges the support of the Wellcome Trust, Grant 107851/Z/15/Z

994

## 995 **Author contributions**

996 **SHW** - designed the experiments, collected samples, performed RNA  
997 preparation, chromatin immunoprecipitation preparation, luciferase reporter  
998 assays, cloning and mutagenesis, analysed/interpreted data, prepared the  
999 manuscript and figures. **MH** – Bioinformatic analysis, data analysis and  
1000 submission, sequencing, prolactin assay, figure preparation and revised the  
1001 manuscript. **YM** - Bioinformatic analysis, immunohistochemistry, luciferase  
1002 reporter assays, cloning and mutagenesis, figure preparation and revised  
1003 manuscript. **YC** – ISO-seq and bioinformatic analysis **KM** –  
1004 immunohistochemistry and analysis. **HC** – performed EM and analysis, revised  
1005 manuscript. **BRCS** - collected samples and performed the in situ hybridization,  
1006 luciferase reporter assays, cloning and mutagenesis. **NB** – collected samples  
1007 and provided lab support. **JM** - developed the novel prolactin assay and  
1008 prepared antibodies. **ASM** - collected samples, designed experiments,  
1009 developed the prolactin assay, and revised the manuscript. **SM** - collected  
1010 samples, designed experiments, prolactin assay, and revised manuscript. **DWB**  
1011 - designed experiments, bioinformatics analysis, and revised the manuscript.  
1012 **ASIL** – conceived the study, designed experiments, collected samples,  
1013 analysed/interpreted data, and prepared the manuscript.

1014

1015 **Supplementary Figure legends**

1016 **Supplementary Fig. 1:** Photoperiod dependent epigenetic regulation of  
1017 transcription in the *Pars tuberalis*

1018 a. Triple immunofluorescence showing expression of aGSU (red), TSHb  
1019 (green), and EYA3 (blue) in the PT on SP day 28 and LP day 28. Scale bars,  
1020 50 um.

1021 b. RNAseq log2 counts per million (CPM) of TSHb (purple) and CHGA  
1022 (green) over the experiment. Grey shading represents SP sampling points.  
1023 Error bars represent the SEM.

1024 c. In situ hybridization and quantification for CHGA mRNA at SP day 84, LP  
1025 day 1, 7, 28, 112, SP day 1, 7, 28. Representative images are shown (n =  
1026 3). Error bars represent the SD. Statistical analysis by one-way ANOVA  
1027 confirms there is a significant seasonal change. \*\*\*\* = p-value less than  
1028 0.00005.

1029 d. As in c for EYA3 mRNA . \*\* = p-value less than 0.005.

1030 e. PT thyrotroph chromatin density at LP and SP day 28, given as the  
1031 percentage of dense chromatin contained within the nucleus relative to  
1032 nucleus size. N=3 individuals from SP and LP. 40 nuclei were measured per  
1033 group. T-test was used to assess statistical significance. \*\* = FDR less than  
1034 0.00001

1035 f. PT thyrotroph, PT follicular stellate (FS) cell, pars distalis (PD) FS cells  
1036 and PD somatotroph nucleus measurements (um) at LP and SP day 28.  
1037 N=3 individuals from SP and LP. 40 nuclei were measured per group. T-test  
1038 was used to assess statistical significance. \*\* = FDR less than 0.00001

1039 g. Percentage of genes with a given number of transcription start sites in the  
1040 genomic background (all >0 log2CPM expressed genes) of the pars  
1041 tuberalis (grey bars) as compared to all seasonally differentially expressed  
1042 genes (white bars).

1043 h. Comparison of the prevalence of multiple (>1) TSS across different gene  
1044 cohorts. The cohorts are LP 28 days up-regulated DEGs (solid red), SP 28  
1045 days up-regulated DEGs (solid blue) and all PT expressed genes as the  
1046 background (solid black). Prevalence of multiple TSS on genes is shown for  
1047 all thresholds (%) of the uppermost expressed genes (i.e. increasing  
1048 thresholds for the upper quantile of gene expression). The equivalent gene  
1049 expression (log2CPM) values for upper quantiles for a lower threshold cutoff  
1050 upper x-axis. Dashed lines indicate the proportion of gene in the cohorts  
1051 with multiple H3K4me3 (>1) marked TSS.

1052

1053 **Supplementary Fig. 2:** Epigenetic regulation of a seasonal E-box enriched  
1054 promoter in EYA3

1055 a. Plot of all over-represented motifs in the active promoters of LP day 84  
1056 up-regulated genes. The axis plot the percentage of inferred active  
1057 promoters, containing one or more observed motifs, for a given cohort of  
1058 genes. Active promoters are defined as contiguous H3K4me3 marked  
1059 regions within 100bp of a TSS. The black triangles represents the motif  
1060 abundance on active promoters in all the genes expressed (>0 CPM) in the  
1061 pars tuberalis (PT) and the percentage of their active promoters containing  
1062 a binding motif for LP (x-axis) and SP (y-axis) H3K4me3 environments. The  
1063 circles are the motif coverage of activate promoters in differentially up-  
1064 regulated LP genes (FDR < 0.05; fishers two-way exact test).

1065 b. As in G for the over-represented motifs in the TSS of LP down-regulated  
1066 genes when compared to SP day 84.

1067

1068 c. ChIP-seq tracks for *CHGA* gene H3K4me3 peaks for the whole  
1069 experiment. Chromsome 2 region is shown. Pink represents samples in long  
1070 photoperiod and marine green represents short photoperiod. Solid green  
1071 arrows are canonical E-box motifs. Blue arrows are D-box motifs. Gene  
1072 schematic is also shown.

1073 d. Correlation plot for *CHGA* downstream TSS log<sub>2</sub> H3K4me<sub>3</sub> peaks from  
1074 ChIP-seq versus *CHGA* log<sub>2</sub> counts per million (CPM) from RNA-seq. Red  
1075 symbols are LP sampling points, green are SP sampling points. Correlation  
1076 coefficient R is shown. R=0.843, p-value=0.009.

1077 e. As in A for *EYA3* gene. Chromosome 2 region is shown.

1078 f. As in B for *EYA3* up-stream TSS. R=0.368, p-value=0.458.

1079 g Transactivation of the *EYA3*-upstream-TSS-luc reporter versus the *EYA3*-  
1080 downstream-TSS-luc reporter by TEF, CLOCK and BMAL1. The experiment  
1081 was repeated 4 times (n=4 per experiment), plot displayed is a  
1082 representative result. A one-way ANOVA was performed on each individual  
1083 experiment using Tukey's multiple comparisons test. Different letters  
1084 indicate significant differences between groups (P < 0.01). Error bars SEM.

1085 h Transactivation of the *EYA3*-downstream-TSS-luc reporter by TEF,  
1086 CLOCK, BMAL1 and BMAL2. The experiment was repeated 4 times (n=4  
1087 per experiment), plot displayed is a representative result. A one-way  
1088 ANOVA was performed on each individual experiment using Tukey's  
1089 multiple comparisons test. Different letters indicate significant differences  
1090 between groups (P < 0.01). Error bars SEM.

1091 **Supplementary Fig. 3:** Diurnal gene expression analysis show enrichment for  
1092 repressors at SP ZT20

1093 a. Volcano plots showing the number of genes up (yellow) and  
1094 downregulated (blue) across the day in SP and LP. All comparisons were  
1095 pairwise against ZT0 pairwise comparisons. ZT24 is included to show the  
1096 consistency between time-points. ZT timepoints are indicated above each  
1097 plot and the light dark transistion is shown below. Numbers on the plots are  
1098 the number of significantly up or down regulated genes in that pairwise  
1099 comparison (Supplementary Table 6).

1100 b. RNA-seq log<sub>2</sub> CPM plots. Light dark bars shown a the bottom and  
1101 indicated on the graph by dotted line and grey shading. Error bars are SD.  
1102 Statistical significances are in (Supplementary Table 6).



1103 c. Enrichment term analysis using CPDB and radial plots of ZT time against  
1104  $-\log_{10}$  pvalue (terms further out have lower pvalues) to indicate the  
1105 functional enrichments at each peak phase.

1106 d. TopGO analysis of genes differentially expressed between SP ZT20 and  
1107 LP ZT4, i.e. 12 hours after lights off. Enrichment is shown as  $-\text{Log}_{10}$  p-value.

1108 e. RNA-seq  $\log_2$  CPM plots. Light dark bars shown at the bottom and  
1109 indicated on the graph by dotted line and grey shading. Error bars are SD.  
1110 Statistical significances are in (Supplementary Table 6).

1111 **Supplementary Fig. 4:** STRING analysis reveals that the SP ZT20 repressors  
1112 are high connected to the LP ZT4 transcriptome

1113 a. Repressor genes up-regulated at ZT20 in SP (red boxes) were analysed  
1114 for their connectivity, and therefore interaction with the genes up-  
1115 regulated at ZT4 in LP (Yellow boxes and down-regulated (blue boxes).  
1116 A high degree of protein-protein interaction (PPI) connectivity was  
1117 found to the up-regulated genes (see red lines on network). Black  
1118 borders on gene boxes indicate presence of E-boxes in the promoter.  
1119 b. Number of differentially expressed genes (DEGs), up-regulated (yellow)  
1120 and down-regulated (blue) for a daily mean (all 24 hour timepoints)  
1121 between SP vs LP on day 28, compared to LP ZT4 vs SP ZT20 contrast.  
1122 Connectivity via protein-protein interactions (PPI), defined by STRING  
1123 to transcriptional repressors is indicated by the checkered shading (also  
1124 represented in Fig. 4a). The significance of enrichment (fishers two-way  
1125 exact test) for PPI connectivity within the up-regulated vs down-  
1126 regulated genes is shown.

1127 **Supplementary Fig. 5:** Melatonin implant validation and DEC1 repression

1128 a. Melatonin concentration after implantation compared to sham and  
1129 pre-implantation. Values are pg/ml. Mean and SD shown.  
1130 b. Transactivation of the EYA3-downstream-TSS-luc reporter versus  
1131 EYA3-upstream-TSS-luc reporter by TEF, CLOCK, BMAL1 and  
1132 BMAL2, and the effect of DEC1. The up-stream promoter is not  
1133 significantly repressed by DEC1 but the downstream TSS activation

1134 is significantly suppressed. The experiment was repeated 4 times  
1135 (n=4 per experiment), plot displayed is a representative result. A one-  
1136 way ANOVA was performed on each individual experiment using  
1137 Tukey's multiple comparisons test. Different letters indicate  
1138 significant differences between groups ( $P < 0.01$ ). Error bars SEM.

1139

1140 c. Transactivation of the EYA3-downstream-TSS-luc reporter by TEF,  
1141 CLOCK, BMAL1 and BMAL2, and the suppression by DEC1. The  
1142 experiment was repeated 4 times (n=4 per experiment), plot  
1143 displayed is a representative result. A one-way ANOVA was  
1144 performed on each individual experiment using Tukey's multiple  
1145 comparisons test. Different letters indicate significant differences  
1146 between groups ( $P < 0.01$ ). Error bars SEM. d. Transactivation of the  
1147 EYA3-downstream-TSS-luc reporter by TEF, CLOCK and BMAL1,  
1148 and the effect of DEC2 (12.5 to 50ng). The experiment was repeated  
1149 4 times (n=4 per experiment), plot displayed is a representative result.  
1150 A one-way ANOVA was performed on each individual experiment  
1151 using Tukey's multiple comparisons test. Different letters indicate  
1152 significant differences between groups ( $P < 0.01$ ). Error bars SEM.

1153 **Supplementary Fig. 6:** Quality check of H3K4me3 ChIP-seq.

1154 a. Pie charts revealing distributions of H3K4me3 peaks on each genomic  
1155 feature. Peaks of promoter-TSS were located on  $\pm 1000$  bp from TSS.

1156 b. Bar plots revealing percentages of H3K4me3 peaks co-localised with CGIs  
1157 (left) and CGIs co-localised with H3K4me3 peaks (right) on the sheep  
1158 genome. Black is observed H3K4me3 peaks in PTs and grey is randomly  
1159 shuffled peaks with the same fragment sizes as negative controls.

1160 **Supplementary Fig. 7:** Overview the analysis workflow for ChIP-seq

1161 **List of Supplementary Tables**

1162 Supplementary Table 1: Seasonal epigenetic changes, MACs peak calling  
1163 ChIP-seq H3k4me3

- 1164 Supplementary Table 2: Seasonal epigenetic changes, SICER differential peak  
1165 analysis for H3K4me3
- 1166 Supplementary Table 3: Seasonal gene expression, pairwise contrasts for  
1167 RNA-seq
- 1168 Supplementary Table 4: CAGE transcription start site clusters and their relative  
1169 seasonal abundance
- 1170 Supplementary Table 5: RNA-seq expression for known H3K4me3 modulators
- 1171 Supplementary Table 6: Diurnal gene expression, statistical analysis of 24 hour  
1172 profiles from RNA-seq

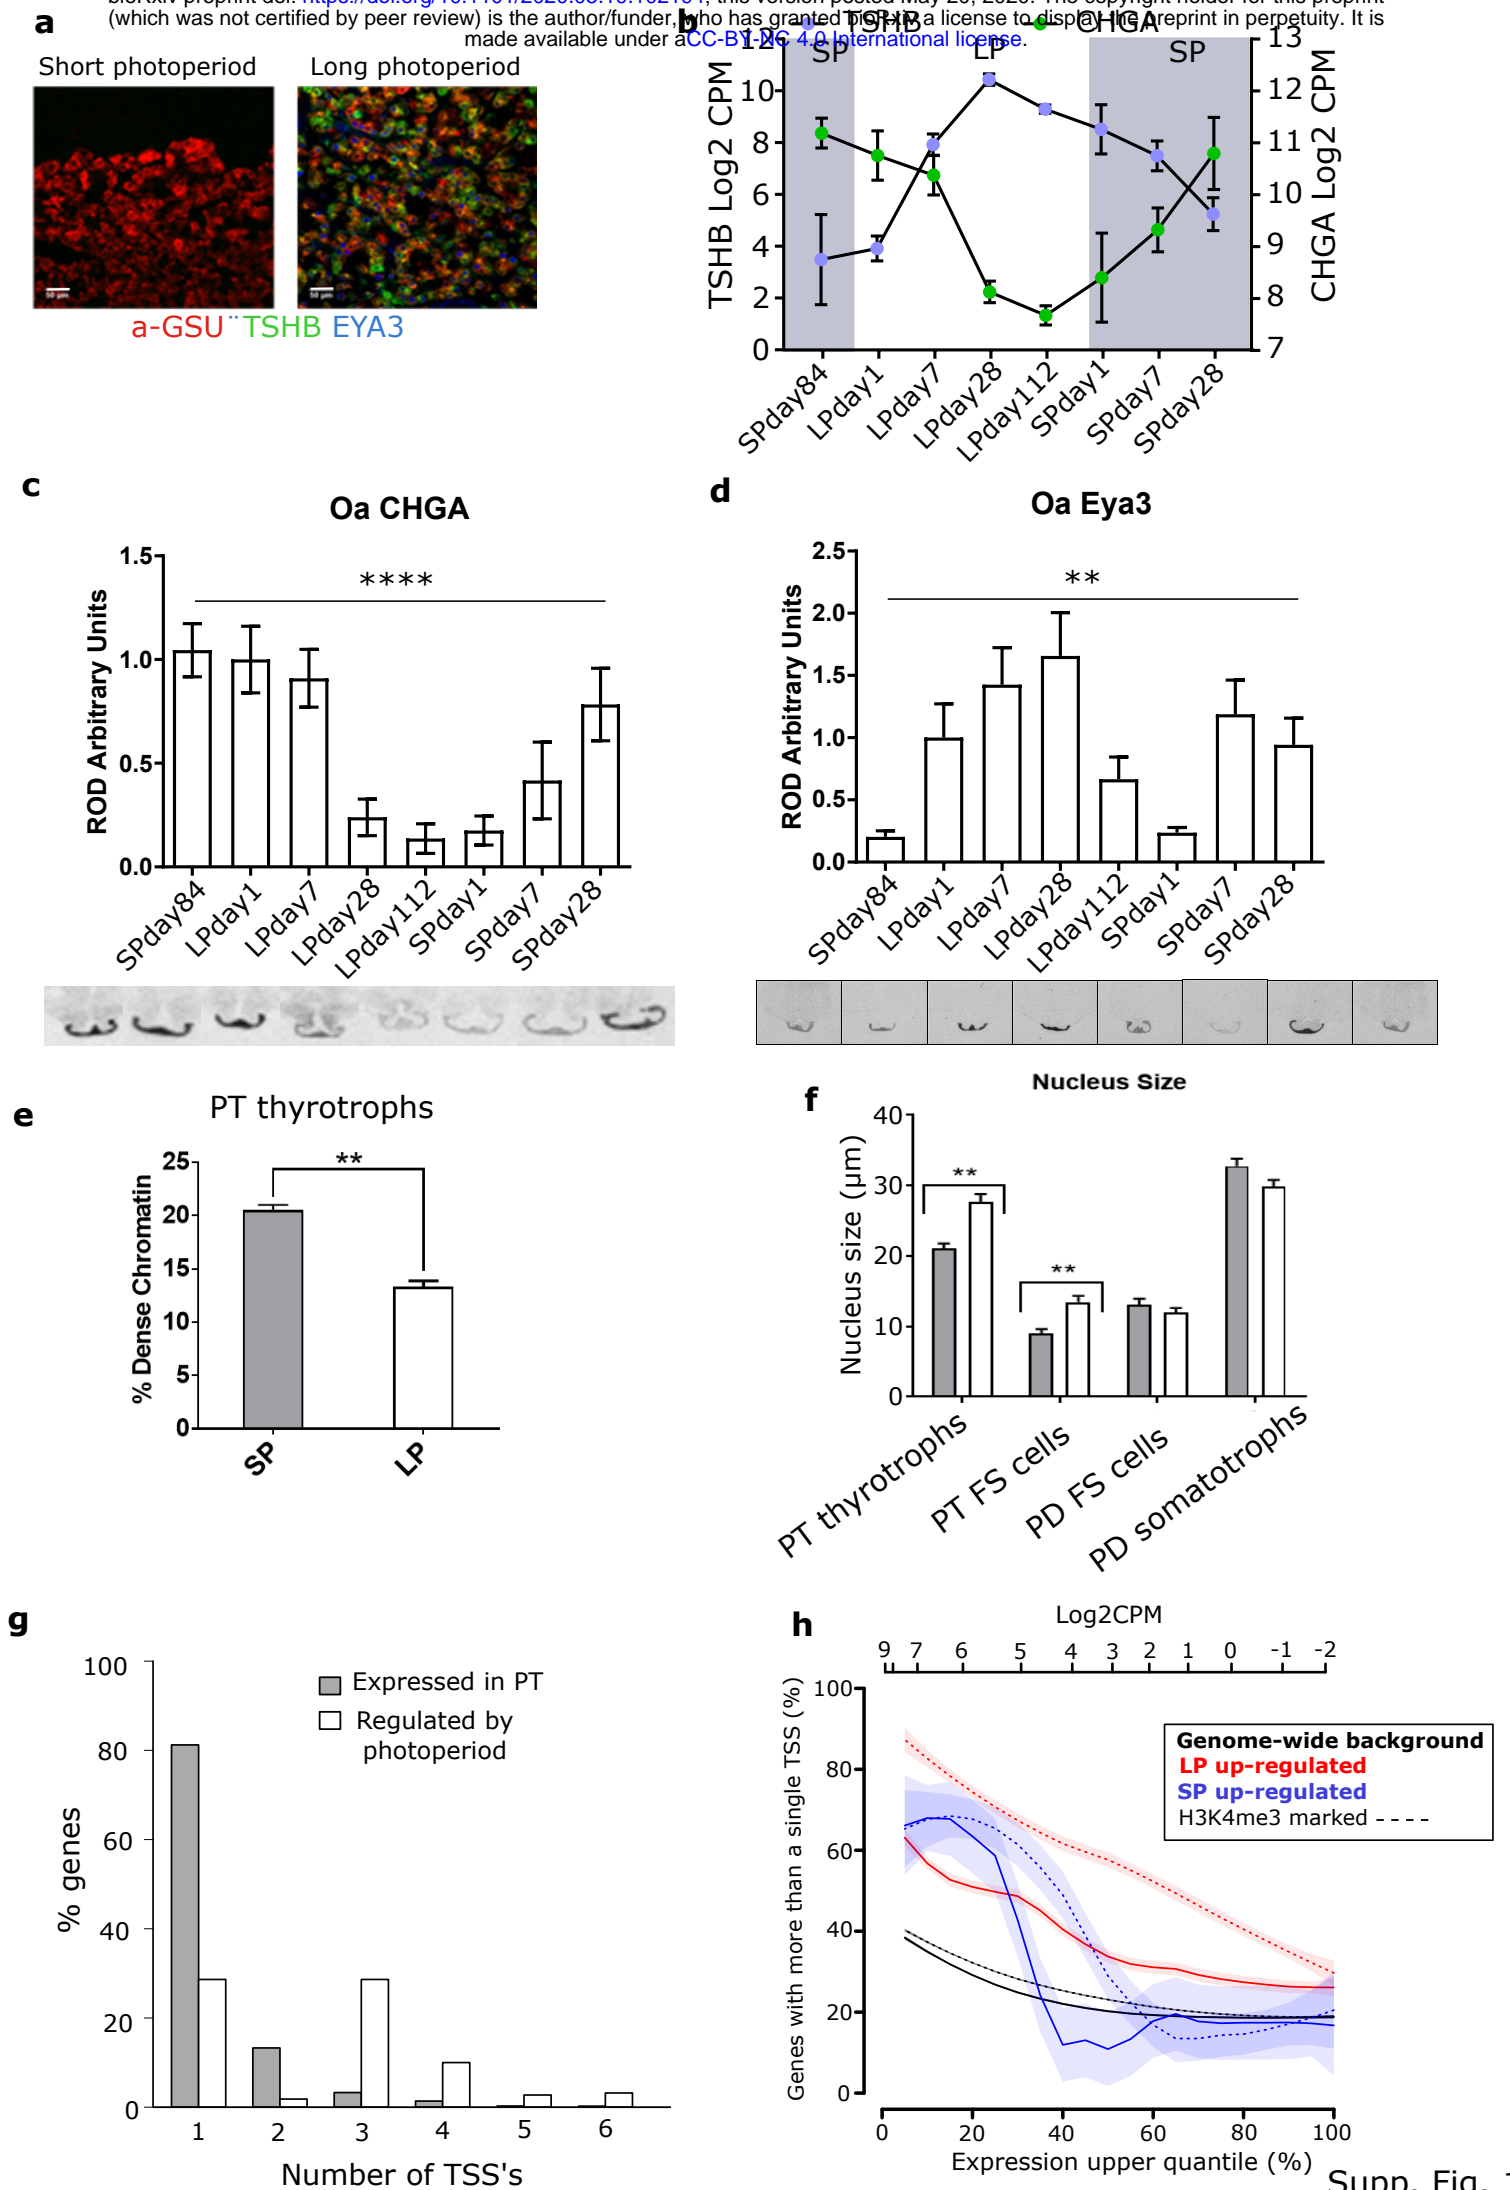

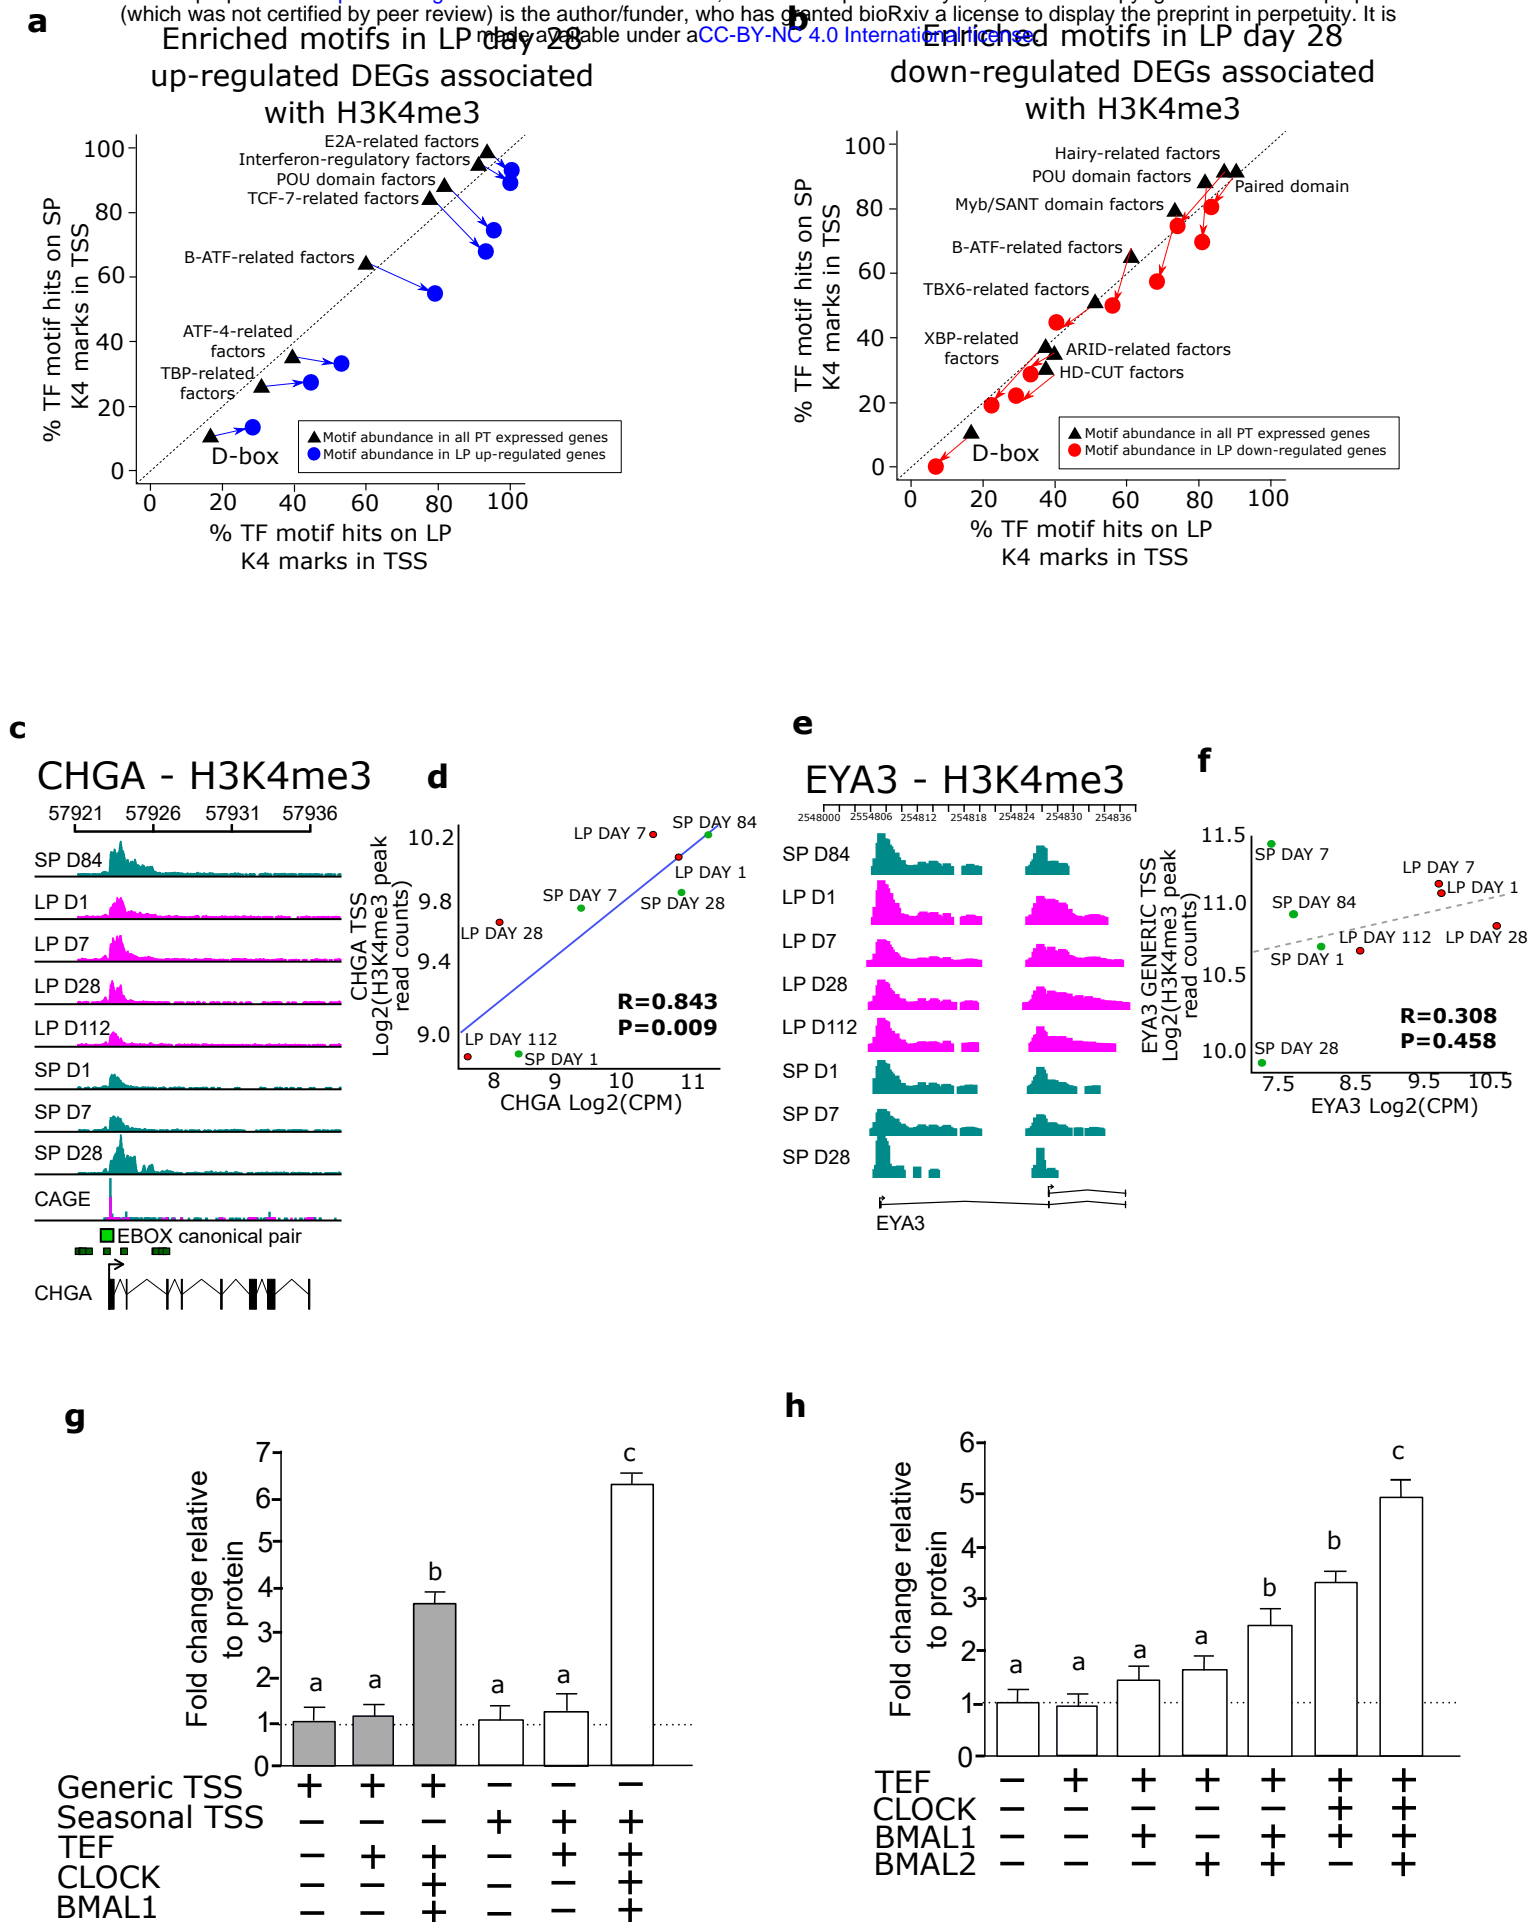

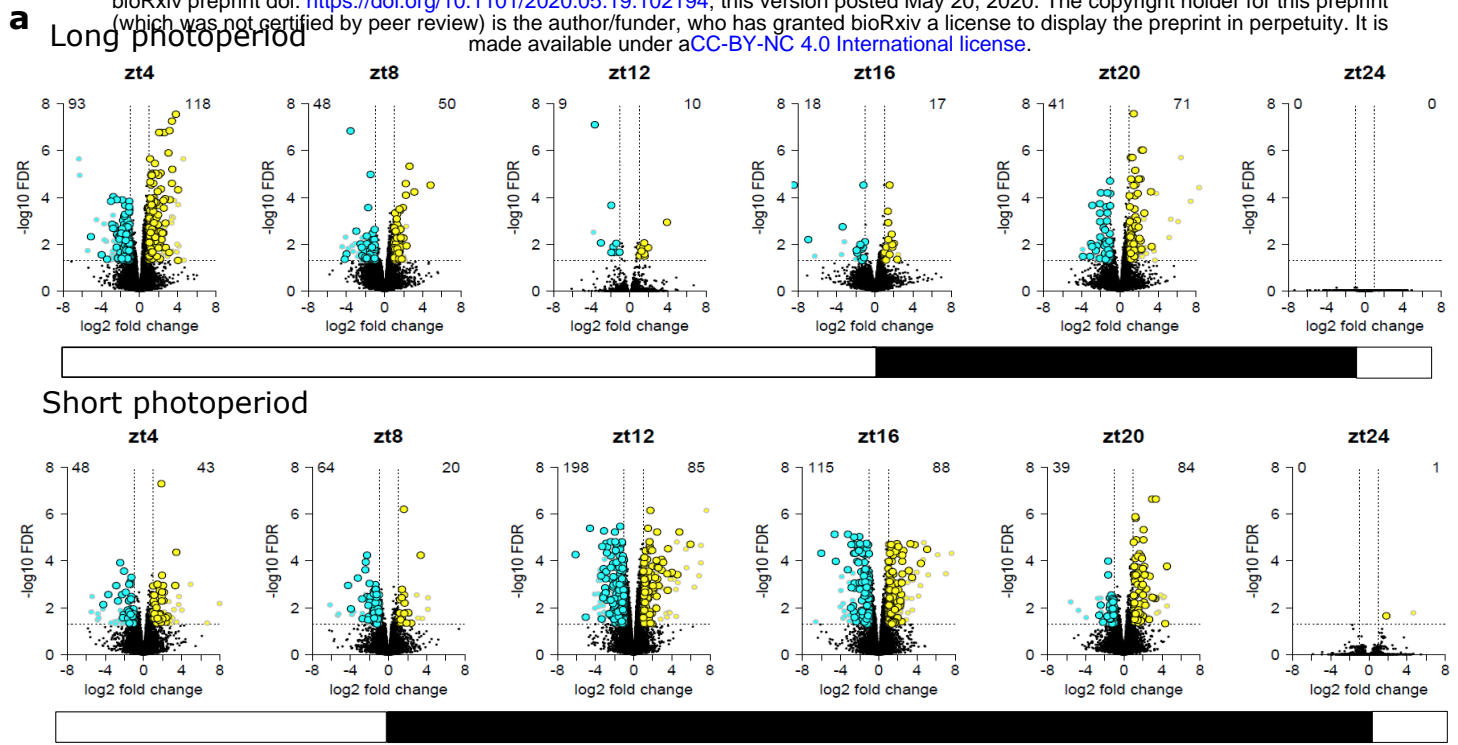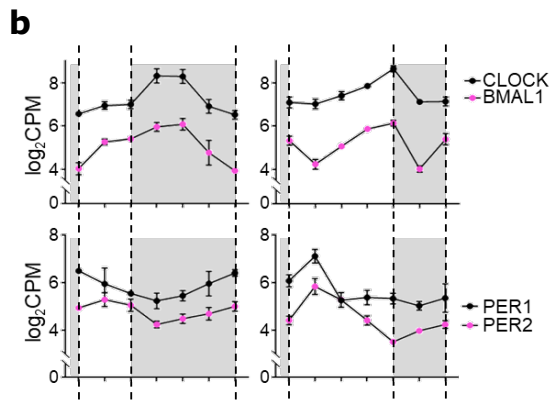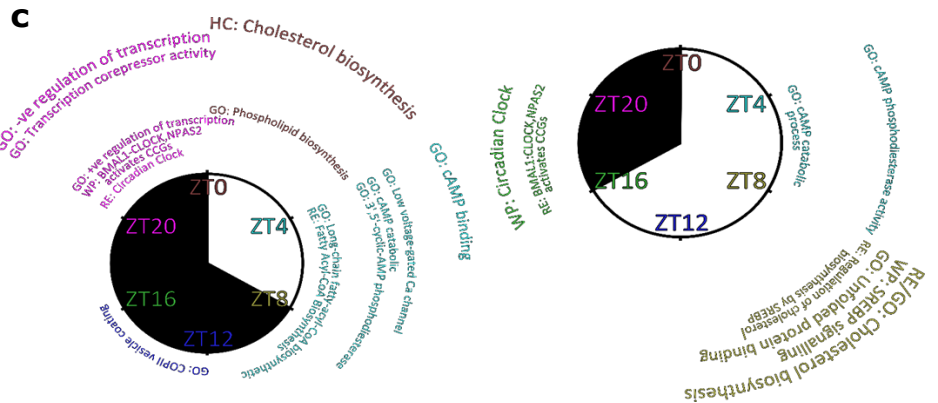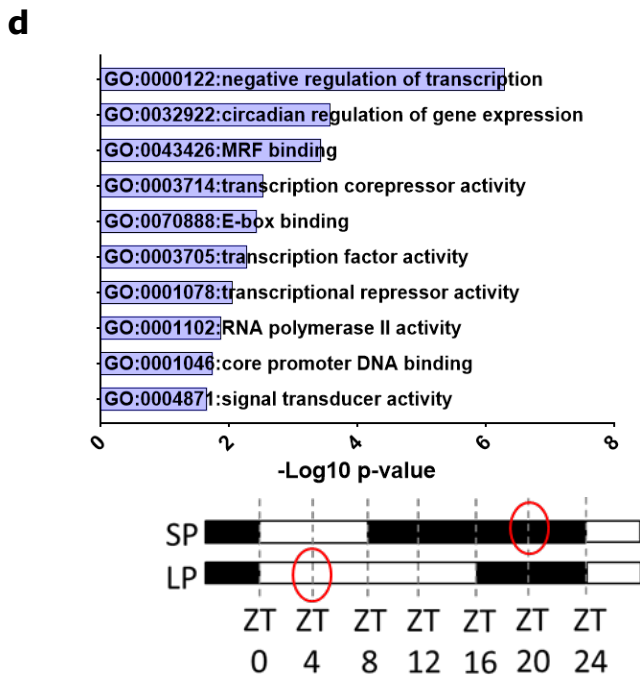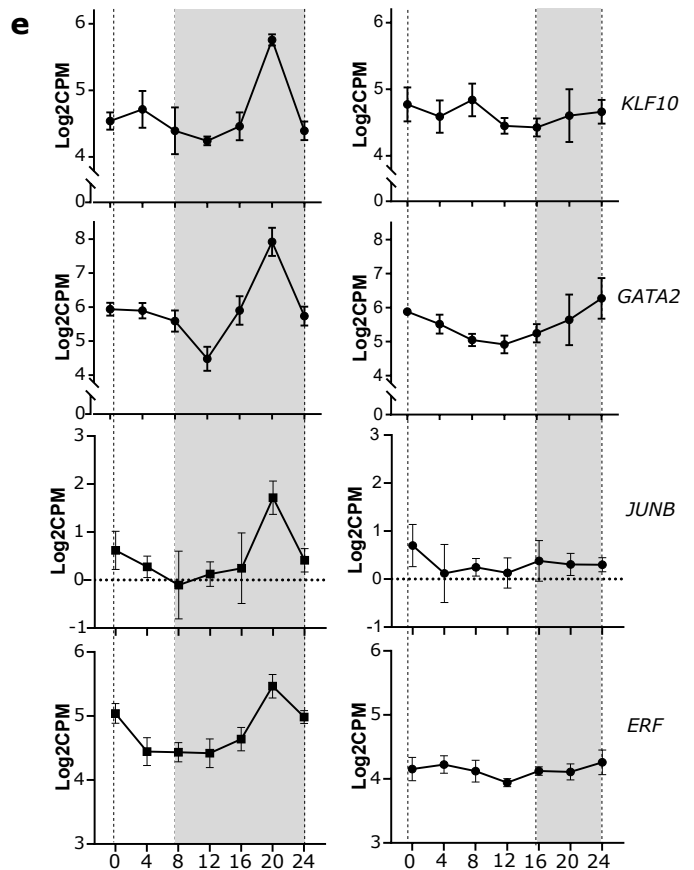

**a**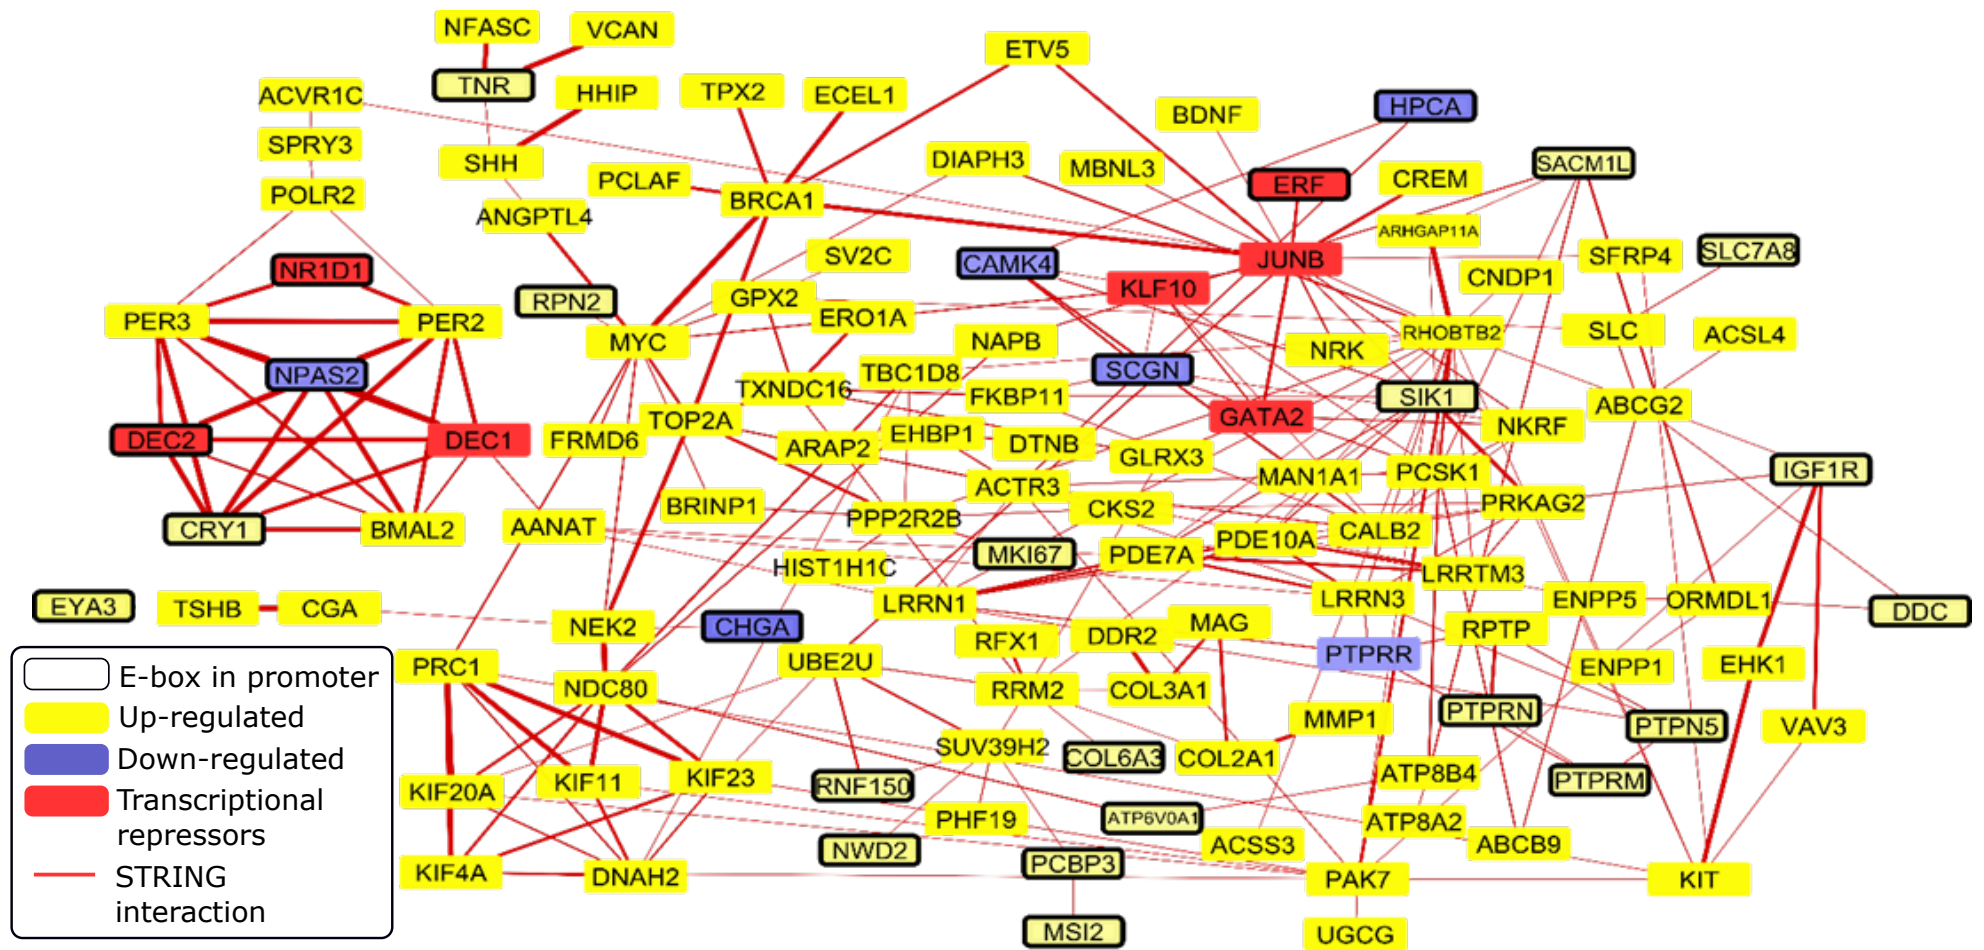**b**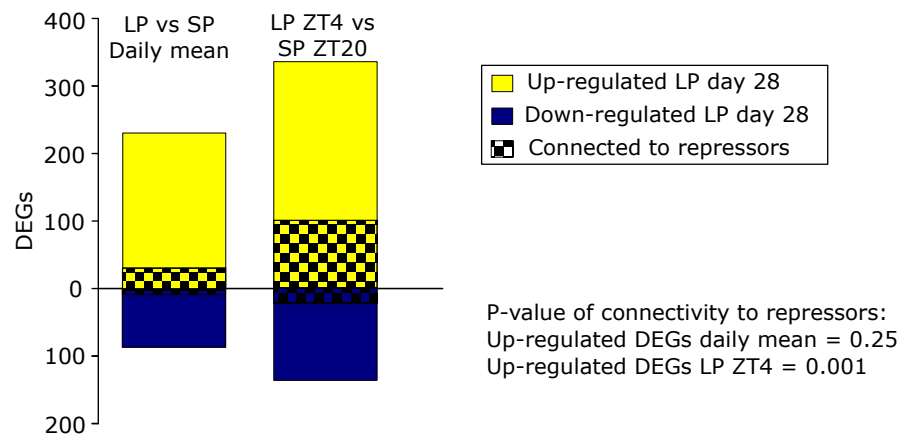

**a**

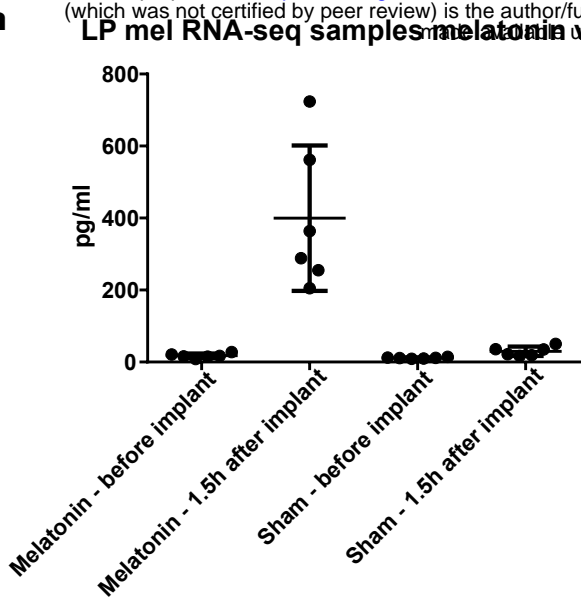

**b**

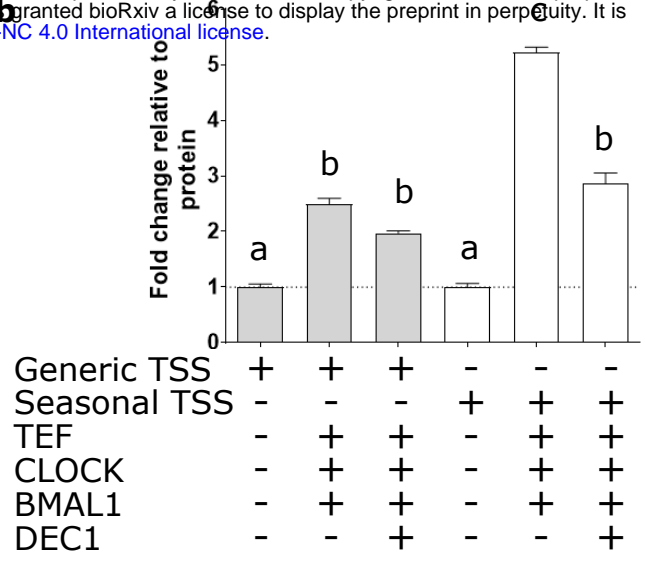

**c**

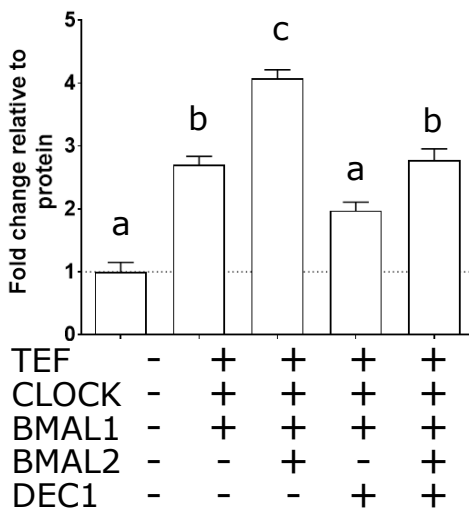

**d**

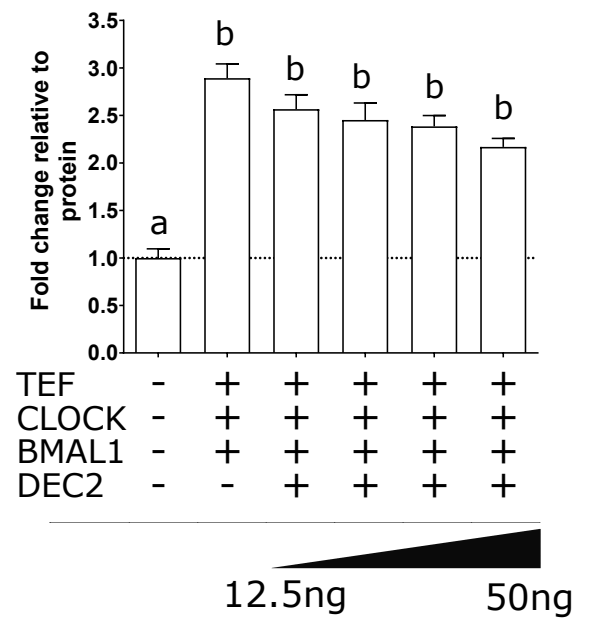



**a**

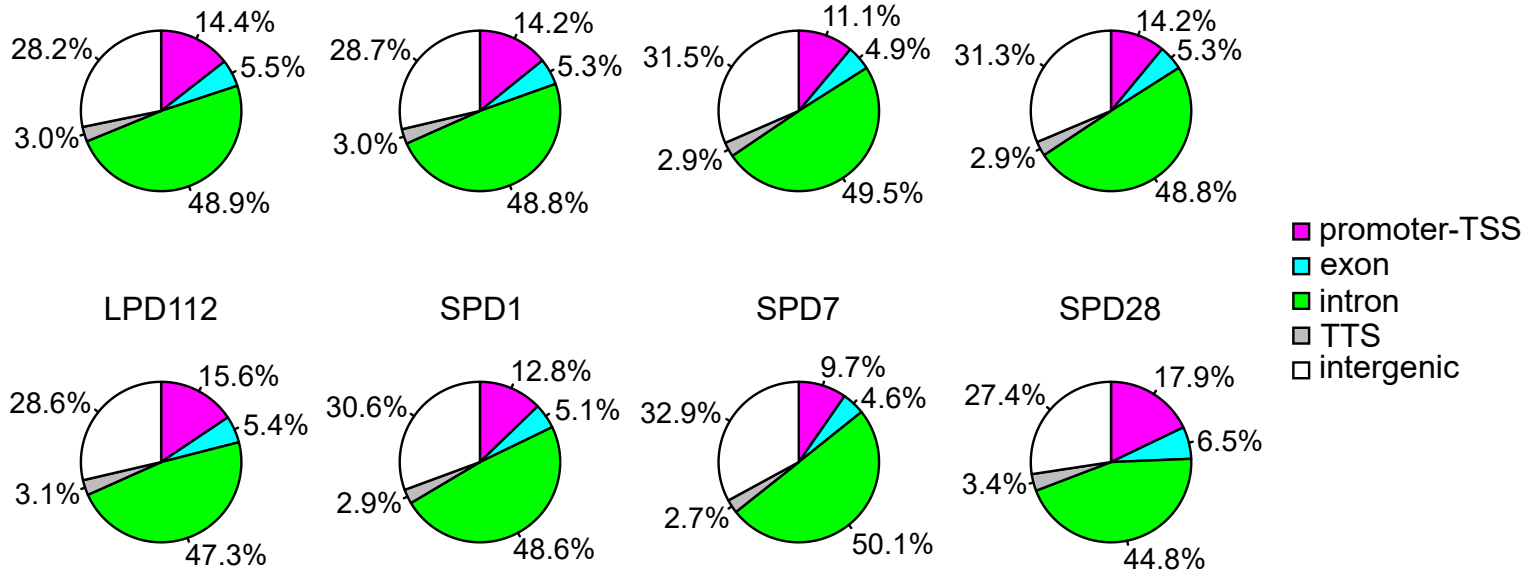

**b**

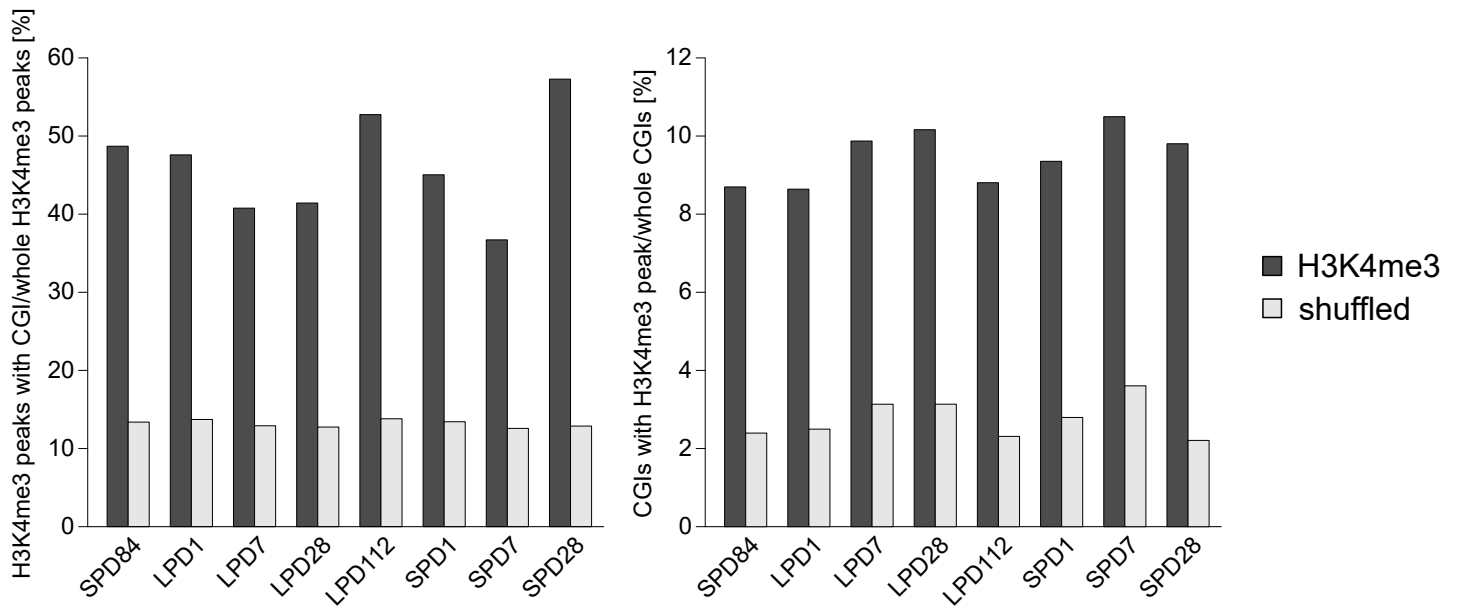

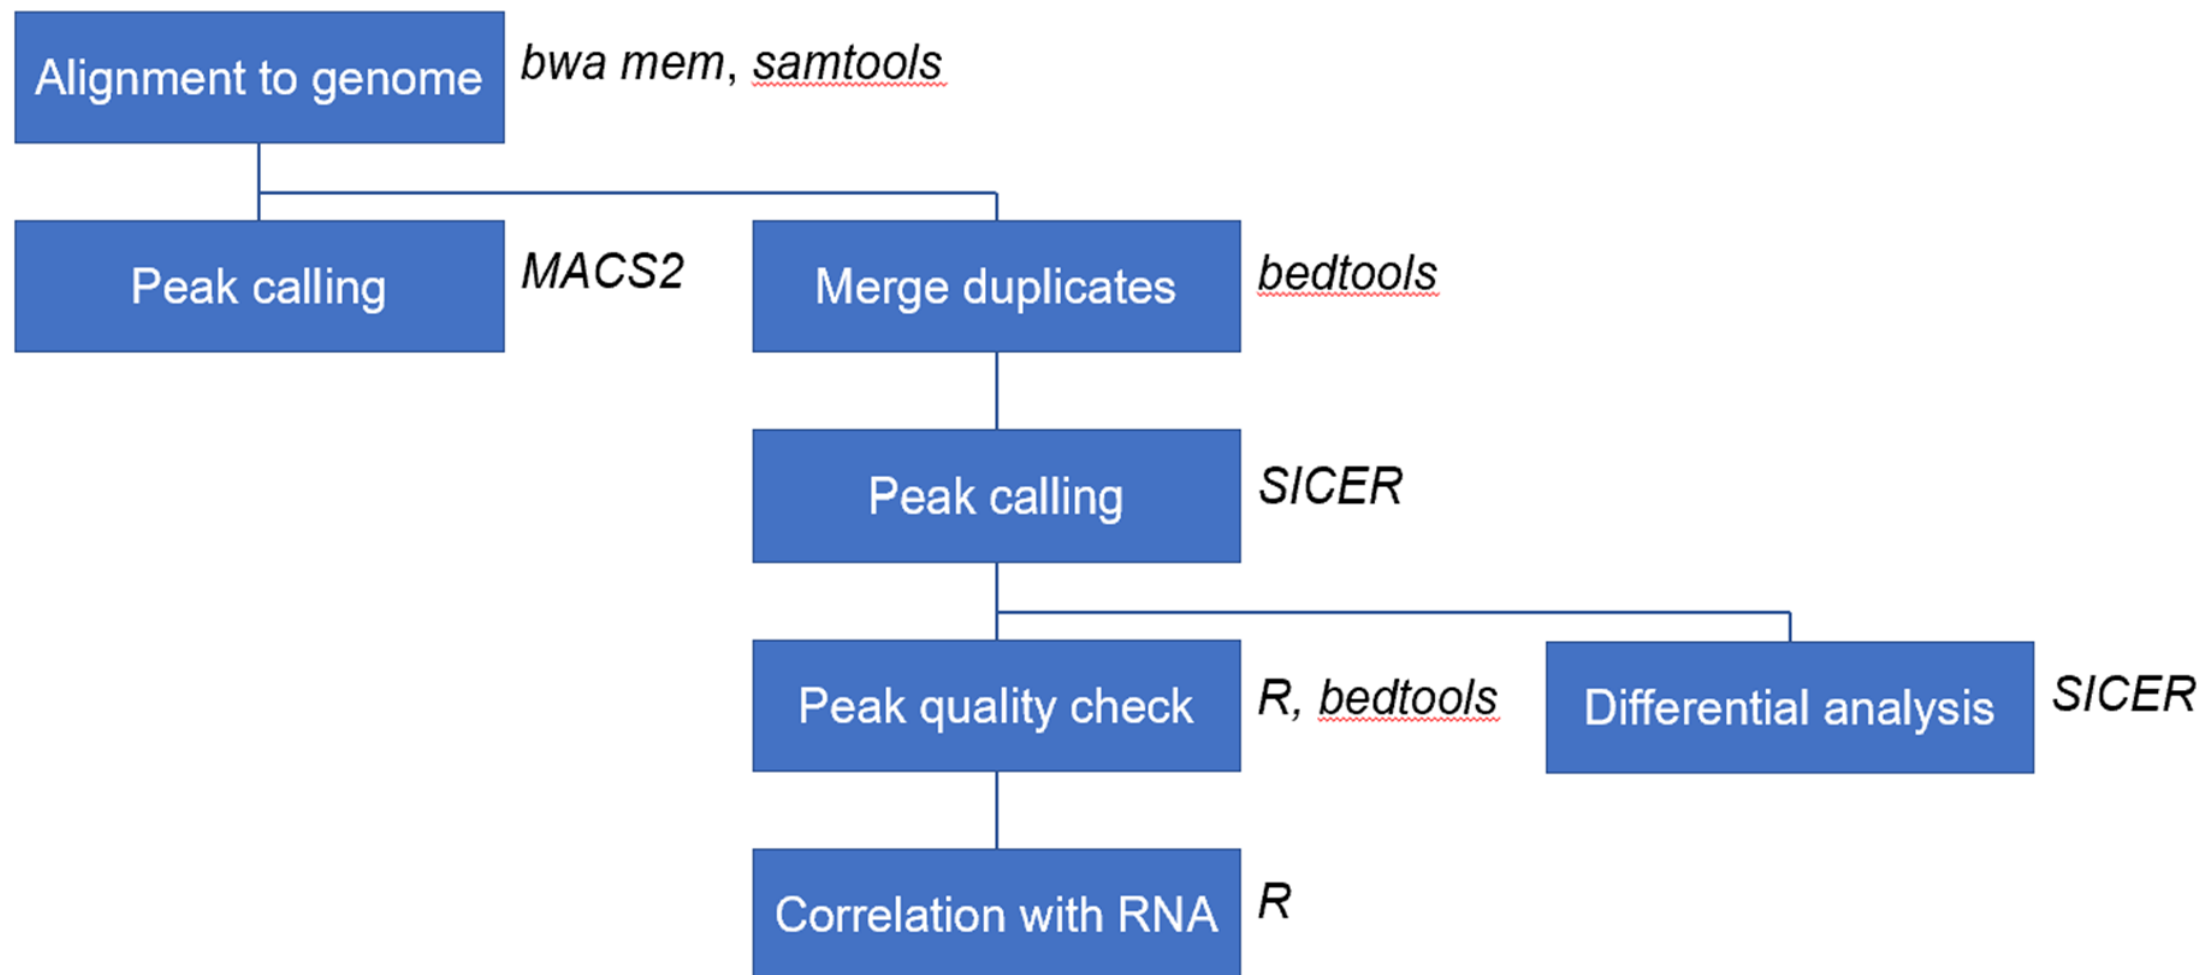

Source: https://www.biorxiv.org/content/biorxiv/early/2020/05/20/2020.05.19.102194.full.pdf
